# Supplementary material for: Uranium particle age dating, aggregation, and model age best estimators
Source: Royal Society of Chemistry journal article supplement (doi:10.1039/d5an00249d), 2025-01-01
Supplement: d5an00249d1.xlsx [file d5an00249d1.xlsx]

## Sheet: Background Summary
background rate (counts/s)	background_er	time (s)	average expected bkgd. counts
0	0.0005	400	0
0.0005	0.0005	400	0.2
0.001	0.0005	400	0.4
0.0015	0.0005	400	0.6
0.002	0.0005	400	0.8
0.0025	0.0005	400	1
0.003	0.0005	400	1.2
0.0035	0.0005	400	1.4
0.004	0.0005	400	1.6
0.0045	0.0005	400	1.8
0.005	0.0005	400	2
0.006	0.0005	400	2.4
0.007	0.0005	400	2.8
0.008	0.0005	400	3.2
0.009	0.0005	400	3.6
0.01	0.0005	400	4
0.011	0.0005	400	4.4
0.012	0.0005	400	4.8
0.013	0.0005	400	5.2
Abundance sensitivity not included explicitly. Expected abundace sensitivity rate or counts can be added to expected background to locate the correct table.
Background uncertainty may vary.

## Sheet: b=0.0000
bkgd rate	0	average expected bkgd counts in 400 s	0
N	mid68	+-	CI68 LL	CI68 UL	CI95 LL	CI95 UL
0	0.56	0.56	0	1.12	0	2.925
1	1.207	1.092	0.115	2.299	0.001	4.553
2	2.192	1.481	0.711	3.673	0.218	6.226
3	3.194	1.807	1.386	5.001	0.623	7.896
4	4.21	2.027	2.183	6.237	1.114	9.201
5	5.21	2.265	2.944	7.475	1.693	10.682
6	6.158	2.461	3.697	8.619	2.28	11.968
7	7.233	2.673	4.56	9.906	2.769	13.311
8	8.153	2.851	5.302	11.004	3.674	14.795
9	9.05	3.024	6.027	12.074	4.246	16.265
10	10.126	3.166	6.96	13.292	4.835	17.312
11	11.042	3.327	7.715	14.368	5.261	18.535
12	12.18	3.43	8.751	15.61	6.204	19.896
13	13.183	3.561	9.622	16.745	6.89	20.955
14	14.257	3.746	10.512	18.003	7.594	22.264
15	15.166	3.882	11.284	19.049	8.535	23.684
16	16.249	4	12.249	20.249	9.235	25.032
17	17.212	4.12	13.092	21.332	10.139	26.295
18	17.834	4.265	13.569	22.098	10.702	27.606
19	19.008	4.379	14.628	23.387	11.942	29.21
20	20.274	4.463	15.811	24.737	12.093	29.844
30	30.129	5.385	24.744	35.515	20.633	41.882
40	40.545	6.267	34.278	46.812	28.604	53.39
50	50.185	6.946	43.239	57.131	37.752	65.179
60	60.634	7.682	52.952	68.317	45.678	75.657
70	70.178	8.245	61.933	78.423	54.754	87.266
80	80.229	8.779	71.45	89.008	64.098	98.75
90	90.089	9.413	80.677	99.502	72.028	108.959
100	100.164	10.123	90.041	110.286	81.036	120.691
200	200.153	14.225	185.928	214.379	173.306	228.603
300	300.509	17.075	283.434	317.585	267.404	334.174
400	401.277	20.131	381.146	421.408	361.631	440.152
500	501.235	22.237	478.998	523.472	458.284	545.076

## Sheet: b=0.0005
bkgd rate	0.0005	average expected bkgd counts in 400 s	0.2
N	mid68	+-	CI68 LL	CI68 UL	CI95 LL	CI95 UL
0	0.566	0.566	0	1.133	0	2.903
1	1.108	1.075	0.034	2.183	0	4.54
2	2.156	1.487	0.669	3.643	0.105	6.15
3	3.126	1.798	1.327	4.924	0.445	7.552
4	4.156	2.082	2.074	6.237	0.909	9.165
5	5.225	2.302	2.923	7.527	1.548	10.621
6	6.035	2.491	3.544	8.526	2.083	12.063
7	7.024	2.677	4.347	9.701	2.77	13.374
8	8.007	2.856	5.151	10.864	3.588	14.87
9	9.092	3.016	6.076	12.108	4.235	16.147
10	10.02	3.17	6.85	13.19	4.823	17.3
11	11.193	3.355	7.838	14.548	5.496	18.751
12	11.986	3.467	8.519	15.452	6.207	19.953
13	13.218	3.619	9.599	16.836	6.749	21.126
14	13.946	3.706	10.24	17.652	7.658	22.399
15	15.03	3.842	11.188	18.871	8.437	23.615
16	16.353	3.978	12.376	20.331	8.991	24.742
17	16.902	4.11	12.791	21.012	9.927	26.233
18	18.253	4.229	14.025	22.482	10.891	27.432
19	19.087	4.439	14.648	23.525	11.455	28.87
20	19.904	4.468	15.436	24.373	11.939	29.559
30	30.158	5.429	24.729	35.587	20.451	41.831
40	40.337	6.405	33.932	46.741	28.376	53.378
50	49.97	7.055	42.915	57.025	37.309	65.205
60	60.145	7.959	52.187	68.104	45.341	76.324
70	70.128	8.383	61.745	78.511	54.844	87.52
80	80.089	8.777	71.312	88.866	63.502	98.035
90	90.392	9.423	80.969	99.816	72.02	108.886
100	100.184	9.978	90.206	110.162	81.953	120.788
200	199.86	14.123	185.737	213.983	174.075	228.869
300	300.421	17.195	283.225	317.616	267.633	335.292
400	399.896	19.991	379.905	419.888	362.813	440.124
500	501.058	22.168	478.89	523.225	458.394	544.706

## Sheet: b=0.0010
bkgd rate	0.001	average expected bkgd counts in 400 s	0.4
N	mid68	+-	CI68 LL	CI68 UL	CI95 LL	CI95 UL
0	0.568	0.568	0	1.136	0	2.905
1	1.025	1.025	0	2.05	0	4.404
2	1.979	1.488	0.491	3.467	0.002	5.867
3	2.972	1.771	1.201	4.743	0.414	7.552
4	4.069	2.059	2.01	6.129	0.76	8.913
5	5.113	2.327	2.785	7.44	1.275	10.543
6	5.862	2.458	3.405	8.32	2.057	11.869
7	6.932	2.682	4.25	9.614	2.647	13.199
8	7.975	2.849	5.126	10.824	3.31	14.523
9	9.019	3.021	5.998	12.041	3.949	15.848
10	10.116	3.188	6.928	13.305	4.503	17.082
11	10.985	3.346	7.639	14.33	5.339	18.514
12	12.139	3.493	8.645	15.632	5.798	19.544
13	12.98	3.615	9.365	16.596	6.572	20.868
14	14.055	3.743	10.313	17.798	7.444	22.297
15	14.998	3.887	11.111	18.885	8.271	23.681
16	16.042	3.978	12.063	20.02	9.156	24.947
17	16.826	4.11	12.716	20.935	9.994	25.752
18	17.849	4.225	13.624	22.074	10.702	27.338
19	18.897	4.434	14.463	23.33	11.219	28.611
20	19.852	4.384	15.468	24.236	12.155	29.638
30	29.98	5.423	24.557	35.403	20.683	41.743
40	40.201	6.341	33.86	46.542	28.452	53.544
50	49.92	6.981	42.939	56.901	37.066	64.608
60	59.833	7.712	52.121	67.545	46.081	76.1
70	69.626	8.361	61.265	77.987	54.052	86.772
80	80.134	9.015	71.119	89.149	63.432	98.213
90	89.614	9.534	80.08	99.148	72.772	109.336
100	99.945	9.899	90.046	109.845	81.735	120.456
200	199.775	14.195	185.58	213.97	173.265	228.386
300	300.021	17.273	282.748	317.294	266.748	334.429
400	398.689	19.836	378.852	418.525	360.981	439.52
500	499.195	22.217	476.978	521.412	458.134	545.826

## Sheet: b=0.0015
bkgd rate	0.0015	average expected bkgd counts in 400 s	0.6
N	mid68	+-	CI68 LL	CI68 UL	CI95 LL	CI95 UL
0	0.568	0.568	0	1.135	0	2.935
1	0.98	0.976	0.004	1.956	0.001	4.245
2	1.784	1.45	0.334	3.234	0.001	5.727
3	2.876	1.804	1.073	4.68	0.086	7.325
4	3.76	2.078	1.682	5.838	0.596	8.921
5	4.826	2.293	2.533	7.12	1.086	10.196
6	5.776	2.505	3.271	8.281	1.839	11.695
7	6.705	2.687	4.018	9.392	2.374	13.071
8	7.86	2.84	5.02	10.7	3.084	14.346
9	8.865	3.032	5.833	11.896	3.711	15.657
10	9.631	3.212	6.419	12.843	4.464	17.042
11	10.798	3.341	7.457	14.14	5.249	18.326
12	11.447	3.464	7.983	14.911	6.029	19.758
13	12.84	3.632	9.208	16.472	6.509	20.724
14	13.784	3.771	10.012	17.555	7.334	22.142
15	14.923	3.868	11.055	18.791	8.012	23.19
16	15.465	4.073	11.392	19.539	8.671	24.531
17	16.399	4.132	12.267	20.531	9.349	25.603
18	17.644	4.168	13.476	21.812	10.596	27.073
19	19.162	4.317	14.845	23.479	11.084	28.175
20	19.855	4.487	15.367	24.342	11.777	29.172
30	29.676	5.506	24.17	35.181	20.091	41.798
40	39.436	6.345	33.091	45.782	28.325	52.874
50	50.116	7.021	43.096	57.137	36.89	64.404
60	59.633	7.646	51.988	67.279	45.507	76.077
70	69.931	8.439	61.492	78.37	54.193	86.897
80	80.147	8.97	71.176	89.117	63.067	98.32
90	89.025	9.362	79.662	98.387	72.945	109.135
100	99.461	9.909	89.552	109.37	81.017	119.873
200	199.585	14.072	185.513	213.657	172.887	227.549
300	299.11	17.136	281.974	316.246	266.668	334.265
400	398.406	19.834	378.572	418.24	362.037	438.882
500	498.707	22.352	476.354	521.059	456.244	543.624

## Sheet: b=0.0020
bkgd rate	0.002	average expected bkgd counts in 400 s	0.8
N	mid68	+-	CI68 LL	CI68 UL	CI95 LL	CI95 UL
0	0.564	0.564	0	1.127	0	2.943
1	0.936	0.936	0	1.872	0	4.193
2	1.602	1.412	0.19	3.014	0.001	5.623
3	2.545	1.793	0.752	4.337	0.001	6.978
4	3.588	2.057	1.531	5.644	0.465	8.717
5	4.563	2.291	2.272	6.853	1.074	10.116
6	5.545	2.48	3.065	8.026	1.683	11.598
7	6.623	2.663	3.96	9.286	2.098	12.78
8	7.742	2.857	4.886	10.599	2.924	14.178
9	8.717	3.051	5.666	11.767	3.396	15.52
10	9.542	3.189	6.353	12.731	4.275	16.865
11	10.707	3.339	7.367	14.046	5.03	18.187
12	11.63	3.464	8.165	15.094	5.757	19.429
13	12.501	3.631	8.87	16.133	6.592	20.827
14	13.473	3.788	9.684	17.261	7.135	21.905
15	14.595	3.813	10.783	18.408	7.835	23.042
16	15.605	3.969	11.635	19.574	8.853	24.389
17	16.876	4.109	12.767	20.985	9.328	25.814
18	17.697	4.248	13.449	21.945	10.053	26.822
19	18.386	4.366	14.02	22.752	11.278	28.155
20	19.5	4.453	15.047	23.952	11.719	29.471
30	29.937	5.435	24.501	35.372	19.968	41.298
40	39.51	6.3	33.21	45.81	28.243	53.134
50	49.494	7.066	42.427	56.56	36.568	64.099
60	59.448	7.742	51.706	67.19	45.586	75.849
70	69.918	8.351	61.567	78.269	54.457	86.903
80	80.408	8.917	71.492	89.325	62.797	97.46
90	89.777	9.401	80.376	99.178	71.597	108.377
100	99.613	9.917	89.696	109.53	81.099	120.101
200	199.593	14.066	185.527	213.658	172.603	227.839
300	300.616	17.257	283.358	317.873	266.24	334.097
400	399.538	19.552	379.987	419.09	361.567	438.702
500	499.383	22.12	477.263	521.504	457.298	543.15

## Sheet: b=0.0025
bkgd rate	0.0025	average expected bkgd counts in 400 s	1
N	mid68	+-	CI68 LL	CI68 UL	CI95 LL	CI95 UL
0	0.566	0.565	0	1.131	0	2.894
1	0.9	0.9	0	1.799	0	4.06
2	1.419	1.344	0.076	2.763	0	5.383
3	2.44	1.749	0.691	4.189	0.001	6.8
4	3.445	2.027	1.418	5.472	0.328	8.373
5	4.405	2.256	2.149	6.661	0.827	9.883
6	5.508	2.487	3.02	7.995	1.509	11.252
7	6.287	2.656	3.63	8.943	2.036	12.522
8	7.391	2.844	4.547	10.235	2.789	14.027
9	8.203	3.049	5.154	11.252	3.271	15.31
10	9.218	3.173	6.045	12.391	3.807	16.425
11	10.528	3.363	7.165	13.891	4.712	18.025
12	11.42	3.463	7.958	14.883	5.589	19.314
13	12.323	3.608	8.715	15.931	6.296	20.584
14	13.396	3.782	9.614	17.179	6.691	21.746
15	14.322	3.858	10.465	18.18	7.857	23.091
16	15.551	3.976	11.575	19.527	8.579	24.303
17	16.181	4.154	12.028	20.335	9.293	25.603
18	17.502	4.246	13.256	21.748	10.024	26.76
19	18.23	4.325	13.905	22.555	10.756	27.739
20	19.45	4.463	14.988	23.913	11.352	28.922
30	29.277	5.444	23.833	34.72	19.432	40.768
40	39.567	6.339	33.228	45.906	27.772	52.317
50	49.792	7.021	42.772	56.813	36.384	64.285
60	59.1	7.666	51.434	66.766	45.559	75.578
70	68.767	8.402	60.365	77.169	53.87	86.632
80	79.628	8.917	70.711	88.545	62.718	97.963
90	89.546	9.561	79.986	99.107	71.581	108.683
100	99.615	10.029	89.586	109.644	80.973	120.099
200	199.262	14.01	185.252	213.272	172.626	227.538
300	299.02	17.281	281.739	316.301	267.436	334.27
400	400.355	20.401	379.954	420.757	362.023	439.843
500	499.535	22.143	477.392	521.678	456.864	543.16

## Sheet: b=0.0030
bkgd rate	0.003	average expected bkgd counts in 400 s	1.2
N	mid68	+-	CI68 LL	CI68 UL	CI95 LL	CI95 UL
0	0.569	0.569	0	1.138	0	2.947
1	0.868	0.867	0	1.735	0	3.99
2	1.288	1.286	0.002	2.574	0	5.225
3	2.106	1.7	0.406	3.806	0.011	6.619
4	3.292	2.041	1.251	5.333	0.143	8.056
5	4.208	2.268	1.94	6.476	0.68	9.632
6	5.173	2.481	2.693	7.654	1.261	11.097
7	6.243	2.692	3.551	8.935	1.771	12.359
8	7.223	2.898	4.326	10.121	2.47	13.963
9	8.114	3.008	5.106	11.121	3.286	15.188
10	9.259	3.214	6.045	12.473	3.831	16.4
11	10.196	3.329	6.867	13.525	4.519	17.765
12	11.212	3.496	7.716	14.708	5.255	18.925
13	12.265	3.608	8.656	15.873	6.233	20.433
14	13.284	3.809	9.475	17.093	6.92	21.812
15	14.069	3.884	10.184	17.953	7.414	22.754
16	15.386	3.994	11.392	19.38	8.287	24.178
17	16.5	4.128	12.372	20.628	9.122	25.289
18	17.347	4.238	13.109	21.585	9.736	26.284
19	17.957	4.329	13.628	22.286	10.495	27.599
20	19.385	4.4	14.985	23.784	10.974	28.484
30	29.057	5.468	23.589	34.526	19.447	40.876
40	39.079	6.281	32.798	45.359	27.524	52.647
50	49.412	7.041	42.372	56.453	36.409	64.109
60	59.22	7.636	51.584	66.856	45.316	75.212
70	69.457	8.32	61.138	77.777	53.275	86.178
80	79.066	8.854	70.212	87.921	62.695	97.407
90	88.603	9.338	79.264	97.941	71.632	108.694
100	99.471	9.9	89.572	109.371	80.808	119.677
200	198.552	14.337	184.215	212.889	173.087	228.365
300	299.796	17.344	282.451	317.14	266.873	335.57
400	400.047	19.728	380.32	419.775	362.578	438.917
500	499.208	21.806	477.403	521.014	457.543	543.254

## Sheet: b=0.0035
bkgd rate	0.0035	average expected bkgd counts in 400 s	1.4
N	mid68	+-	CI68 LL	CI68 UL	CI95 LL	CI95 UL
0	0.563	0.563	0	1.127	0	2.881
1	0.838	0.837	0	1.675	0	3.982
2	1.25	1.247	0.003	2.497	0	5.157
3	2.039	1.681	0.357	3.72	0.004	6.524
4	3.134	2.011	1.123	5.145	0.044	7.857
5	4.036	2.243	1.793	6.278	0.44	9.282
6	5.107	2.472	2.635	7.579	0.951	10.822
7	6.073	2.689	3.384	8.763	1.726	12.363
8	7.074	2.891	4.183	9.965	2.199	13.526
9	7.985	3.005	4.98	10.99	2.825	14.728
10	9	3.163	5.837	12.162	3.784	16.297
11	9.952	3.329	6.622	13.281	4.22	17.197
12	11.069	3.443	7.626	14.512	4.98	18.419
13	11.814	3.579	8.235	15.393	6.03	20.003
14	12.837	3.762	9.076	16.599	6.697	21.363
15	14.117	3.846	10.27	17.963	7.153	22.382
16	15.007	4.023	10.984	19.03	8.141	23.764
17	16.04	4.112	11.928	20.152	8.771	24.961
18	17.146	4.175	12.971	21.321	9.796	26.34
19	18.119	4.397	13.722	22.516	10.213	27.47
20	19.041	4.516	14.525	23.558	10.944	28.579
30	29.048	5.471	23.577	34.519	18.848	40.409
40	38.851	6.328	32.523	45.179	27.395	52.002
50	49.472	7.086	42.386	56.558	35.649	63.631
60	58.915	7.688	51.227	66.603	45.119	75.365
70	68.754	8.315	60.439	77.07	53.466	85.976
80	78.954	8.858	70.096	87.812	62.389	97.365
90	88.786	9.489	79.297	98.274	71.266	108.353
100	98.713	9.961	88.752	108.674	80.874	119.632
200	198.365	14.102	184.262	212.467	171.91	227.057
300	298.546	16.971	281.574	315.517	266.034	332.074
400	398.005	19.973	378.032	417.978	360.232	437.962
500	498.408	22.456	475.952	520.864	456.922	544.594

## Sheet: b=0.0040
bkgd rate	0.004	average expected bkgd counts in 400 s	1.6
N	mid68	+-	CI68 LL	CI68 UL	CI95 LL	CI95 UL
0	0.567	0.567	0	1.134	0	2.941
1	0.809	0.809	0	1.618	0	3.835
2	1.184	1.184	0	2.368	0	4.996
3	1.738	1.613	0.125	3.351	0.003	6.35
4	2.73	1.979	0.752	4.709	0.007	7.617
5	3.937	2.23	1.708	6.167	0.314	9.074
6	4.937	2.483	2.454	7.42	0.82	10.6
7	5.831	2.699	3.133	8.53	1.663	12.315
8	6.889	2.87	4.019	9.759	2.137	13.471
9	7.682	3.039	4.643	10.721	2.723	14.639
10	8.646	3.186	5.46	11.832	3.424	16.119
11	9.971	3.329	6.641	13.3	4.463	17.671
12	10.718	3.498	7.22	14.216	4.862	18.531
13	11.565	3.632	7.933	15.198	5.658	19.998
14	12.735	3.719	9.016	16.453	6.321	21.032
15	13.798	3.897	9.9	17.695	7.026	22.154
16	14.867	3.998	10.869	18.864	8.028	23.752
17	15.79	4.14	11.651	19.93	8.621	24.973
18	16.716	4.28	12.436	20.997	9.181	25.977
19	17.774	4.375	13.4	22.149	10.502	27.529
20	18.9	4.497	14.403	23.397	10.967	28.532
30	28.982	5.544	23.438	34.525	18.706	40.393
40	38.676	6.357	32.319	45.033	26.939	51.974
50	48.864	7.034	41.83	55.898	36.017	63.855
60	58.332	7.743	50.589	66.075	44.773	75.255
70	68.087	8.315	59.772	76.402	53.089	85.81
80	78.646	8.912	69.735	87.558	62.097	97.145
90	88.697	9.435	79.262	98.132	70.931	108.172
100	99.562	10.087	89.475	109.649	80.234	119.502
200	199.796	14.027	185.769	213.823	171.712	226.896
300	297.598	17.227	280.371	314.825	265.373	332.373
400	398.595	19.912	378.683	418.507	360.272	438.731
500	499.086	22.314	476.772	521.4	455.951	542.852

[truncated: 10 more sheets: b=0.0045, b=0.0050, b=0.0060, b=0.0070, b=0.0080, b=0.0090, b=0.0100, b=0.0110, b=0.0120, b=0.0130]
