# Supplementary material for: Uranium particle age dating, aggregation, and model age best estimators
Source: Royal Society of Chemistry journal article supplement (doi:10.1039/d5an00249d), 2025-01-01
Supplement: d5an00249d2.xlsx [file d5an00249d2.xlsx]

## Sheet: Figures 1, 14
Figures 1 & 14	Purified and remade CRM U630 particles
Purification Date	2021-09-01
Aggregated Model Ages		Model Ages based on Mid68 estimator									CI Upper Limit	CI Lower Limit	CI Upper Limit	CI Lower Limit
Analysis Date	True Age	Model Age	+- 1σ	+95%	-95%	N particles	WMexp	+- 1σ	+-95%	Model Birth Date	UL 68.3%	LL 68.3%	UL 95%	LL 95%
2021-12-10	0.273785	0.462739	0.0630264	0.128016	0.119723	20	0.462542	0.0539733	0.124993	2021-06-23 23:37:40	2021-05-31 23:08:17	2021-07-17 00:07:03	2021-08-06 17:07:04	2021-05-08 05:26:28
2022-03-28	0.569473	0.735414	0.106216	0.221091	0.195137	6	0.71276	0.129229	0.385835	2021-07-02 09:21:34	2021-05-24 14:16:05	2021-08-10 04:27:02	2021-09-11 15:55:55	2021-04-12 15:16:28
2022-07-19	0.87885	1.03347	0.109079	0.222584	0.208053	10	1.07172	0.146717	0.412787	2021-07-06 12:34:45	2021-05-27 16:23:39	2021-08-15 08:45:51	2021-09-20 12:22:24	2021-04-16 05:24:24
2022-10-14	1.11704	1.23971	0.119223	0.246401	0.221158	10	1.17736	0.137177	0.375505	2021-07-18 04:42:42	2021-06-04 15:35:59	2021-08-30 17:49:25	2021-10-06 23:23:08	2021-04-19 04:45:32
2023-01-12	1.36345	1.52489	0.11488	0.246337	0.205491	12	1.40163	0.126165	0.392007	2021-07-04 00:50:30	2021-05-23 01:48:27	2021-08-14 23:52:34	2021-09-17 02:10:33	2021-04-05 01:27:00
2023-07-05	1.83984	2.01428	0.122357	0.254114	0.230578	10	2.10009	0.329393	1.28472	2021-06-29 06:49:21	2021-05-15 14:14:36	2021-08-12 23:24:06	2021-09-21 12:04:17	2021-03-28 11:15:26
2024-01-30	2.41205	2.73109	0.161332	0.327375	0.301874	10	2.65444	0.164106	0.409449	2021-05-07 11:14:33	2021-03-09 13:00:08	2021-07-05 09:28:57	2021-08-25 17:28:18	2021-01-07 21:28:22
2024-08-06	2.9295	3.22784	0.176766	0.362209	0.336829	13	3.22728	0.168498	0.369041	2021-05-15 00:43:39	2021-03-11 11:11:34	2021-07-18 14:15:44	2021-09-15 01:22:21	2021-01-02 17:36:10
2025-04-17	3.62491	3.81845	0.249335	0.513027	0.46001	10	3.87636	0.219695	0.543538	2021-06-22 07:29:46	2021-03-23 05:49:30	2021-09-21 09:10:03	2021-12-07 07:56:30	2020-12-16 22:17:52
Individual Particle Model Ages						CI Lower Limit	CI Upper Limit	CI Lower Limit	CI Upper Limit
Analysis Date	Particle Number	Model Age	+- 1σ	Posterior Mean	+- SD	LL 68.3%	UL 68.3%	LL 95%	UL 95%
2021-12-10	1	0.393919	0.195665	0.442522	0.206905	0.198254	0.589584	0.0860346	0.858668
2021-12-10	2	0.185437	0.185254	0.306329	0.225853	0.000182992	0.370692	7.2462e-05	0.738016
2021-12-10	3	0.74665	0.291941	0.804275	0.306209	0.454709	1.03859	0.251699	1.39905
2021-12-10	4	0.540565	0.233507	0.597531	0.247609	0.307057	0.774072	0.151569	1.08925
2021-12-10	5	0.471276	0.283025	0.573075	0.310204	0.188251	0.754302	0.0520704	1.18972
2021-12-10	6	0.416723	0.416208	0.697796	0.5878	0.000514637	0.83293	0.00028547	1.85811
2021-12-10	7	0.661186	0.66118	1.1555	1.18185	5.905e-06	1.32237	5.905e-06	3.51726
2021-12-10	8	0.200248	0.200178	0.336802	0.291166	6.9866e-05	0.400427	3.462e-05	0.914687
2021-12-10	9	0.272933	0.207137	0.360615	0.233306	0.0657969	0.48007	0.000360425	0.800153
2021-12-10	10	0.654625	0.340403	0.751368	0.36545	0.314222	0.995028	0.121839	1.47713
2021-12-10	11	0.47185	0.259609	0.56219	0.280458	0.212241	0.731458	0.0733355	1.12167
2021-12-10	12	0.456293	0.178259	0.496297	0.185531	0.278034	0.634552	0.158953	0.862501
2021-12-10	13	0.881487	0.595756	1.1066	0.671958	0.285731	1.47724	0.0143502	2.38068
2021-12-10	14	0.636184	0.29537	0.705394	0.315067	0.340814	0.931554	0.137408	1.32021
2021-12-10	15	0.610371	0.319189	0.708659	0.342711	0.291182	0.92956	0.119637	1.39602
2021-12-10	16	0.558909	0.223388	0.602118	0.235309	0.335521	0.782297	0.19184	1.08278
2021-12-10	17	0.169754	0.165019	0.272496	0.206308	0.00473461	0.334773	0.000251202	0.669113
2021-12-10	18	0.973109	0.246651	1.00135	0.25216	0.726459	1.21976	0.536522	1.50204
2021-12-10	19	0.176088	0.145822	0.247431	0.165966	0.030266	0.321909	3.465e-06	0.561683
2021-12-10	20	0.603045	0.420341	0.764305	0.465623	0.182704	1.02339	0.00249108	1.63971
2022-03-28	1	0.954264	0.296021	0.999769	0.304767	0.658243	1.25029	0.43831	1.59985
2022-03-28	2	1.28708	0.317277	1.31719	0.324258	0.969806	1.60436	0.705666	1.95576
2022-03-28	3	0.42398	0.290215	0.530381	0.322822	0.133765	0.714195	0.000105935	1.14389
2022-03-28	4	0.444883	0.232377	0.504396	0.249527	0.212507	0.67726	0.0774459	1.00623
2022-03-28	5	0.641842	0.173171	0.663955	0.17828	0.468671	0.815013	0.338581	1.02144
2022-03-28	6	0.654667	0.234646	0.716639	0.245849	0.420021	0.889313	0.270213	1.20355
2022-07-19	1	1.39722	0.492803	1.48668	0.516413	0.904422	1.89003	0.522378	2.49378
2022-07-19	2	0.736131	0.282977	0.788837	0.298558	0.453154	1.01911	0.229907	1.36896
2022-07-19	3	0.522456	0.307428	0.618439	0.32653	0.215027	0.829884	0.0522839	1.25736
2022-07-19	4	2.12057	0.718399	2.26833	0.739619	1.40217	2.83897	0.932764	3.7238
2022-07-19	5	1.40714	0.266437	1.43328	0.269289	1.1407	1.67357	0.918718	1.9619
2022-07-19	6	0.882665	0.18646	0.90889	0.189011	0.696205	1.06913	0.565193	1.28785
2022-07-19	7	0.783962	0.238243	0.822872	0.244546	0.545719	1.0222	0.377721	1.31397
2022-07-19	8	1.73079	1.16439	2.20479	1.26891	0.566405	2.89518	0.0917977	4.66161
2022-07-19	9	1.02902	0.368028	1.10054	0.38443	0.660993	1.39705	0.393662	1.86022
2022-07-19	10	1.27364	0.452934	1.34807	0.470072	0.82071	1.72658	0.491204	2.28055
2022-10-14	1	1.67348	0.452942	1.73655	0.461627	1.22054	2.12642	0.869754	2.65118
2022-10-14	2	1.13164	0.240091	1.16001	0.245911	0.891549	1.37173	0.701357	1.65025
2022-10-14	3	1.42912	0.288378	1.47945	0.292357	1.14074	1.71749	0.916355	2.0566
2022-10-14	4	1.70865	0.375728	1.75883	0.382217	1.33292	2.08438	1.04994	2.52392
2022-10-14	5	1.18564	0.328235	1.25096	0.336122	0.857404	1.51387	0.630325	1.92237
2022-10-14	6	0.32062	0.320561	0.529508	0.429355	5.8468e-05	0.641181	4.318e-05	1.3694
2022-10-14	7	1.58957	0.658721	1.69779	0.691286	0.930848	2.24829	0.467097	3.07714
2022-10-14	8	0.762407	0.460834	0.900253	0.494842	0.301573	1.22324	0.0504433	1.85607
2022-10-14	9	1.21388	0.312912	1.2512	0.316884	0.900965	1.52679	0.667846	1.87872
2022-10-14	10	0.98416	0.336359	1.06386	0.34891	0.647801	1.32052	0.432822	1.76366
2023-01-12	1	1.25095	0.270258	1.27972	0.275046	0.980694	1.52121	0.768302	1.83275
2023-01-12	2	1.45025	0.276246	1.48581	0.27996	1.174	1.72649	0.955744	2.03775
2023-01-12	3	1.28794	0.428917	1.39604	0.442323	0.859026	1.71686	0.615176	2.29846
2023-01-12	4	1.41104	0.452652	1.4936	0.469864	0.95839	1.86369	0.626293	2.42042
2023-01-12	5	1.24315	0.891123	1.62796	0.992456	0.35203	2.13428	0.00634994	3.514
2023-01-12	6	0.317518	0.317125	0.528901	0.451183	0.000392582	0.634643	0.000334705	1.41914
2023-01-12	7	1.70781	0.382865	1.74974	0.391996	1.32495	2.09068	1.01007	2.53086
2023-01-12	8	1.41623	0.381252	1.48147	0.394288	1.03498	1.79748	0.756114	2.2757
2023-01-12	9	1.69287	0.561845	1.82198	0.579836	1.13103	2.25472	0.782533	2.99891
2023-01-12	10	1.66557	0.291188	1.69805	0.296676	1.37438	1.95675	1.15573	2.31351
2023-01-12	11	1.37504	0.501594	1.4831	0.526611	0.87345	1.87664	0.520352	2.5188
2023-01-12	12	1.91399	0.242027	1.93043	0.243012	1.67197	2.15602	1.46462	2.41283
2023-07-05	1	0.964337	0.673005	1.252	0.745957	0.291332	1.63734	0.0364723	2.6789
2023-07-05	2	3.88175	1.07544	4.04161	1.10428	2.80631	4.95719	2.04658	6.24949
2023-07-05	3	2.38118	0.336577	2.40199	0.340297	2.0446	2.71775	1.76771	3.08685
2023-07-05	4	1.5265	0.467677	1.59966	0.485704	1.05882	1.99418	0.711323	2.56919
2023-07-05	5	2.2944	0.610112	2.41451	0.62586	1.68429	2.90452	1.22594	3.63545
2023-07-05	6	0.754709	0.754696	1.26261	1.07348	1.3131e-05	1.5094	1.3131e-05	3.39381
2023-07-05	7	4.24383	1.84635	4.64312	1.9547	2.39748	6.09017	1.1235	8.47599
2023-07-05	8	1.82443	0.139886	1.83181	0.14064	1.68454	1.96431	1.55987	2.11093
2023-07-05	9	1.9392	0.361314	1.97028	0.365678	1.57789	2.30052	1.28726	2.70699
2023-07-05	10	3.13955	0.500242	3.197	0.509582	2.6393	3.63979	2.23393	4.21724
2024-01-30	1	2.36681	0.64501	2.47552	0.659341	1.7218	3.01182	1.30511	3.83538
2024-01-30	2	2.36956	0.276584	2.3907	0.279527	2.09297	2.64614	1.85668	2.94647
2024-01-30	3	3.43043	0.40283	3.45775	0.405045	3.0276	3.83326	2.67945	4.25718
2024-01-30	4	2.82472	0.503829	2.86458	0.511241	2.32089	3.32855	1.89892	3.89069
2024-01-30	5	2.91808	0.382862	2.93927	0.38821	2.53522	3.30094	2.19332	3.71205
2024-01-30	6	1.7456	0.55797	1.833	0.576876	1.18763	2.30357	0.769141	2.9599
2024-01-30	7	1.91332	0.652209	2.04418	0.680297	1.26111	2.56553	0.814466	3.39593
2024-01-30	8	2.88426	0.342304	2.91305	0.345221	2.54195	3.22656	2.27078	3.61763
2024-01-30	9	2.88442	0.525359	2.97962	0.533494	2.35906	3.40978	1.95786	4.04208
2024-01-30	10	2.93221	0.773837	3.05382	0.792794	2.15837	3.70605	1.61478	4.6386
2024-08-06	1	4.61036	0.655829	4.69933	0.659639	3.95453	5.26619	3.4011	5.96466
2024-08-06	2	3.16044	0.534209	3.19344	0.538644	2.62623	3.69465	2.14772	4.23594
2024-08-06	3	2.46388	0.869023	2.62182	0.90768	1.59485	3.3329	0.929296	4.37375
2024-08-06	4	3.38215	0.556142	3.47927	0.562915	2.82601	3.9383	2.44026	4.61444
2024-08-06	5	3.71209	0.513984	3.76482	0.519061	3.19811	4.22608	2.81683	4.84148
2024-08-06	6	3.05092	0.571267	3.1373	0.579454	2.47966	3.62219	2.05969	4.31009
2024-08-06	7	2.80263	0.37579	2.84693	0.382315	2.42684	3.17842	2.1146	3.60498
2024-08-06	8	2.51079	0.671673	2.64048	0.683974	1.83912	3.18246	1.36935	3.97797
2024-08-06	9	3.42466	0.62085	3.51599	0.626842	2.80381	4.04551	2.36314	4.79523
2024-08-06	10	3.08422	0.36899	3.10625	0.371771	2.71523	3.45321	2.37683	3.82215
2024-08-06	11	4.31976	1.01454	4.41803	1.0399	3.30521	5.3343	2.50957	6.49466
2024-08-06	12	3.06265	0.52364	3.10173	0.53196	2.53901	3.58629	2.10429	4.15424
2024-08-06	13	2.75748	0.626397	2.88326	0.640796	2.13109	3.38388	1.68633	4.15826
2025-04-17	1	3.9151	0.620768	3.95673	0.633821	3.29433	4.53587	2.78455	5.24648
2025-04-17	2	3.82875	0.580199	3.90535	0.584107	3.24855	4.40895	2.82055	5.07685
2025-04-17	3	4.01998	0.646899	4.11455	0.657044	3.37308	4.66688	2.85679	5.41497
2025-04-17	4	4.53309	0.862022	4.61648	0.87408	3.67107	5.39511	2.96762	6.35578
2025-04-17	5	4.79592	0.917688	4.85041	0.937807	3.87823	5.71361	3.08562	6.73567
2025-04-17	6	4.44947	1.04466	4.62604	1.07192	3.40481	5.49413	2.57178	6.6915
2025-04-17	7	2.73771	0.537968	2.82318	0.545689	2.19974	3.27568	1.78967	3.90256
2025-04-17	8	4.60233	0.682651	4.6758	0.689119	3.91968	5.28498	3.36809	6.03844
2025-04-17	9	3.11845	0.573048	3.16797	0.584714	2.5454	3.6915	2.08568	4.35652
2025-04-17	10	3.48329	0.779925	3.58111	0.797886	2.70336	4.26321	2.05576	5.15865

## Sheet: Figure 2
Figure 2	SRNL U-Th particles
RSFs based on CRM U900 on Si	value	er (1 SD)
RSF (O- on Si)	0.79	0.025
RSF (O3- on Si)	0.624	0.02
	Nominally 10%	O3-	Nominally 1%	O-	Nominally 1%	O3-	Nominally 1000 ppm	O-	Nominally 1000 ppm	O3-	Nominally 100 ppm	O3-	Nominally 10 ppm	O3-	Nominally 1 ppm	O3-	Nominally 0 ppm	O3-
	Th/U	+-	Th/U	+-	Th/U	+-	Th/U	+-	Th/U	+-	Th/U	+-	Th/U	+-	Th/U	+-	Th/U	+-
	0.061472	0.00157702	0.00770152	0.000277942	0.00749252	0.000200394	0.000740702	2.6896e-05	0.000801217	2.16546e-05	0.000117262	3.46654e-06	4.76914e-05	1.58465e-06	5.21195e-05	1.70397e-06	9.37164e-05	2.79291e-06
	0.0636587	0.00163298	0.00783001	0.000282339	0.00802864	0.000212707	0.000805566	2.96433e-05	0.000780639	2.09591e-05	0.000114728	3.40144e-06	4.61891e-05	1.39652e-06	5.26557e-05	1.55368e-06	9.44545e-05	3.02325e-06
	0.0650783	0.00166943	0.00796414	0.000288141	0.00803101	0.000212754	0.000773051	2.83879e-05	0.000770554	2.07388e-05	0.000116151	3.24134e-06	4.71788e-05	1.57162e-06	5.07029e-05	1.64702e-06	9.95378e-05	3.15732e-06
	0.0640834	0.00164392	0.00800892	0.000289741	0.00803308	0.000212425	0.000806447	2.96377e-05	0.000767134	2.07125e-05	0.00011378	3.40414e-06	5.05773e-05	1.6379e-06	5.04311e-05	1.64764e-06	9.63085e-05	3.11049e-06
	0.0644388	0.00165301	0.00799568	0.000289237	0.00807252	0.000213881	0.000768939	2.81842e-05	0.000769595	2.04146e-05	0.000123659	3.65954e-06	4.56584e-05	1.50838e-06	5.29939e-05	1.7556e-06	0.000100197	3.19445e-06
	0.0653949	0.00167753	0.00796797	0.000288342	0.00802785	0.000212711	0.000800859	2.94298e-05	0.000779125	2.09899e-05	0.000117984	3.45656e-06	4.87411e-05	1.63286e-06	5.46405e-05	1.83295e-06	9.93211e-05	3.20278e-06
	0.0666223	0.00170902	0.00798701	0.00028896	0.0080339	0.000212794	0.000818173	3.00832e-05	0.000773196	2.06393e-05	0.000114598	3.23866e-06	4.75226e-05	1.58688e-06	5.29714e-05	1.57869e-06	9.93104e-05	3.19764e-06
	0.0630609	0.00161766	0.00783998	0.000283631	0.00812841	0.00021533	0.000788641	2.89932e-05	0.000783251	2.08543e-05	0.000120952	3.52572e-06	4.68321e-05	1.57364e-06	5.28197e-05	1.72717e-06	0.000102666	3.27413e-06
	0.0642911	0.0016492	0.00782874	0.000283216	0.00783866	0.000207016	0.000746272	2.73698e-05	0.000772266	2.07892e-05	0.000115928	3.25722e-06	4.92845e-05	1.64423e-06	5.07126e-05	1.70719e-06	9.68351e-05	3.09511e-06
	0.0650752	0.00166932	0.00793112	0.000286872	0.00798111	0.000211367	0.000736707	2.70318e-05							5.26857e-05	1.73394e-06	9.97444e-05	3.2078e-06
WM, SD	0.0642614	0.00142077	0.00790302	0.000101562	0.00795968	0.000189278	0.000776313	3.00619e-05	0.000777168	1.022e-05	0.000117044	3.11544e-06	4.76297e-05	1.54965e-06	5.22312e-05	1.28567e-06	9.79979e-05	2.85415e-06
SEM, 95% Expanded SEM	0.000449686	0.00103663	3.21277e-05	7.40769e-05	5.99055e-05	0.000138098	9.53587e-06	2.33506e-05	3.40821e-06	8.05751e-06	1.04162e-06	2.45973e-06	5.19295e-07	1.22505e-06	4.08411e-07	9.40182e-07	9.0637e-07	2.08676e-06
N, N_eff	10	9.98226	10	9.99315	10	9.98315	10	9.93827	9	8.99179	9	8.94584	9	8.90508	10	9.90978	10	9.91615
MSWD, MSWD unc.	0.759869	0.47187	0.128974	0.471584	0.867283	0.471846	1.13025	0.47303	0.230366	0.500257	0.781908	0.501701	0.97852	0.502993	0.562893	0.473785	0.884455	0.473616
relative SD uncertainty		0.0221092		0.012851		0.0237796		0.0387239		0.0131503		0.0266177		0.0325354		0.024615		0.0291246
				Combined WM of nominally 1%
			WM	0.00793969	0.00016218	SD
			SEM	3.783e-05	7.96053e-05	+-95% SEM
			N	20	18.379	N_eff
			MSWD	0.58589	0.339237	MSWD unc.
			relative SD uncertainty			0.0204265

## Sheet: Figure 3
Figure 3	Integrated Th concentration profiles of U-Th particles
Set weighted mean values
Nominal Th	Beam	WM	SEM	+/-95%	N_eff	MSWD	MSWD unc.
0.1	O3-	0.0643	0.00045	0.00102	9.98226	0.759869	0.47187
0.01	O-	0.007903	3.213e-05	7.268e-05	9.99	0.13	0.47
0.01	O3-	0.00796	5.991e-05	0.0001355	9.98	0.87	0.47
1000 ppm	O-	0.0007763	9.536e-06	2.293e-05	9.94	1.13	0.47
1000 ppm	O3-	0.0007772	3.408e-06	7.859e-06	8.99	0.23	0.5
100 ppm	O3-	0.000117	1.042e-06	2.402e-06	8.95	0.78	0.5
10 ppm	O3-	4.763e-05	5.193e-07	1.197e-06	8.91	0.98	0.5
1 ppm	O3-	5.223e-05	4.084e-07	9.239e-07	9.91	0.56	0.47
0 ppm	O3-	9.8e-05	9.064e-07	2.05e-06	9.92	0.88	0.47
Curves with expanded uncertainties
Cycle	10% (O3-)	+- Poisson errors (dark red)	10% (O3-)	+- expanded unc.	1% (O-)	+-	1% (O3-)	+-	1000ppm (O-)	+-	1000ppm (O3-)	+-	100ppm (O3-)	+-	10ppm (O3-)	+-	1ppm (O3-)	+-	0ppm (O3-)	+-
1	0.074137	0.00191791	0.074137	0.038808	0.00649123	0.00210589	0.00843045	0.001156	0.0007922	0.00256592	0.000869819	5.3e-05	0.000112002	1.86e-05	5.27e-05	5.818e-06	5.396e-05	6.572e-06	9.372e-05	2.793e-06
2	0.0835091	0.00215264	0.0835091	0.0334526	0.00688522	0.00146018	0.00856711	0.000649312	0.000760016	0.000360078	0.000864108	3.53e-05	0.000120664	1.53e-05	4.915e-05	5.789e-06	5.682e-05	4.52e-06	9.445e-05	3.023e-06
3	0.0902538	0.00232279	0.0902538	0.0335027	0.00732262	0.00152882	0.00856471	0.000470704	0.000774279	0.000251074	0.00086415	3.08e-05	0.000121857	1.06e-05	4.916e-05	3.828e-06	5.643e-05	3.21e-06	9.954e-05	3.157e-06
4	0.0944582	0.00242886	0.0944582	0.0324114	0.00756853	0.00144745	0.00854108	0.000385251	0.000769772	0.00019198	0.00085406	2.84e-05	0.00012479	9.4e-06	4.938e-05	2.971e-06	5.665e-05	2.826e-06	9.631e-05	3.11e-06
5	0.0968346	0.00248861	0.0968346	0.030462	0.0077278	0.00136185	0.00848574	0.000353629	0.000767844	0.000160457	0.000849318	2.7e-05	0.000124989	7.82e-06	4.922e-05	2.439e-06	5.594e-05	2.565e-06	0.0001002	3.194e-06
6	0.0982766	0.00252474	0.0982766	0.0284949	0.00783946	0.00128326	0.00837911	0.00042239	0.000771146	0.000142988	0.000841325	2.6e-05	0.000124656	6.75e-06	4.987e-05	2.346e-06	5.589e-05	2.402e-06	9.932e-05	3.203e-06
7	0.0985761	0.00253177	0.0985761	0.0261127	0.00789645	0.00119557	0.00830121	0.000442572	0.000772667	0.000129647	0.000832444	3.09e-05	0.000124054	6.03e-06	4.917e-05	2.313e-06	5.537e-05	2.268e-06	9.931e-05	3.198e-06
8	0.0982887	0.00252389	0.0982887	0.0238861	0.00790886	0.00110639	0.00824553	0.000440716	0.000772195	0.000118695	0.000825051	3.36e-05	0.000122661	5.88e-06	4.83e-05	2.527e-06	5.569e-05	2.189e-06	0.0001027	3.274e-06
9	0.0973985	0.00250065	0.0973985	0.0218845	0.0079168	0.00103399	0.00817742	0.000476764	0.00077029	0.000109567	0.0008185	3.55e-05	0.00012227	5.42e-06	4.816e-05	2.313e-06	5.479e-05	2.124e-06	9.684e-05	3.095e-06
10	0.0960851	0.00246664	0.0960851	0.0203402	0.0079099	0.000970181	0.00811727	0.000507237	0.000767826	0.000102061	0.000809797	4.16e-05	0.000121744	5.09e-06	4.775e-05	2.239e-06	5.45e-05	2.033e-06	9.974e-05	3.208e-06
11	0.0944524	0.0024245	0.0944524	0.019455	0.00790619	0.000917387	0.00807246	0.000519299	0.000768473	9.67e-05	0.000802093	4.55e-05	0.000120542	5.26e-06	4.767e-05	2.094e-06	5.375e-05	2.319e-06
12	0.0925992	0.00237675	0.0925992	0.0193661	0.00790379	0.000872585	0.0080359	0.000524508	0.000766878	9.15e-05	0.000794634	4.93e-05	0.000119594	5.28e-06	4.788e-05	2.031e-06	5.298e-05	2.625e-06
13	0.0906808	0.00232736	0.0906808	0.0198541	0.00791257	0.000837632	0.00800728	0.000527024	0.000767514	8.76e-05	0.00079007	4.9e-05	0.000118157	5.9e-06	4.789e-05	1.929e-06	5.262e-05	2.552e-06
14	0.0887708	0.00227822	0.0887708	0.0206301	0.00792187	0.000807578	0.00799148	0.000514784	0.000767315	8.39e-05	0.000785511	4.92e-05	0.000118	5.62e-06	4.805e-05	1.885e-06	5.248e-05	2.432e-06
15	0.0868472	0.00222875	0.0868472	0.0217937	0.00792717	0.000779323	0.00798505	0.00049705	0.000767361	8.08e-05	0.00078057	5.13e-05	0.000117739	5.39e-06	4.803e-05	1.806e-06	5.225e-05	2.362e-06
16	0.0849054	0.00217883	0.0849054	0.0233478	0.00792791	0.000752589	0.0079822	0.000480318	0.000769417	7.91e-05	0.00077704	5.13e-05	0.00011689	5.57e-06	4.777e-05	1.885e-06	5.226e-05	2.268e-06
17	0.0830193	0.00213036	0.0830193	0.0249419	0.0079401	0.000735216	0.00798018	0.000465352	0.00077042	7.7e-05	0.000775731	4.98e-05	0.000116951	5.38e-06	4.767e-05	1.837e-06	5.247e-05	2.253e-06
18	0.0812071	0.0020838	0.0812071	0.0264679	0.0079529	0.000721094	0.00797913	0.000451907	0.000771688	7.53e-05	0.000774692	4.83e-05	0.000117207	5.27e-06	4.763e-05	1.781e-06	5.22e-05	2.29e-06
19	0.0794632	0.002039	0.0794632	0.0281216	0.00796414	0.000708516	0.00798111	0.000442177	0.000773051	7.39e-05	0.000772266	4.85e-05	0.000117262	5.11e-06	4.758e-05	1.735e-06	5.212e-05	2.223e-06
20	0.0778213	0.00199682	0.0778213	0.0296523											4.759e-05	1.689e-06
21	0.0763234	0.00195835	0.0763234	0.0307225											4.77e-05	1.721e-06
22	0.0749557	0.00192322	0.0749557	0.0314276											4.769e-05	1.68e-06
23	0.0737211	0.00189151	0.0737211	0.0318308											4.763e-05	1.767e-06
24	0.0726803	0.00186477	0.0726803	0.0317355											4.764e-05	1.732e-06
25	0.0717718	0.00184144	0.0717718	0.0313971											4.765e-05	1.704e-06
26	0.0709535	0.00182042	0.0709535	0.0310058											4.77e-05	1.735e-06
27	0.0702051	0.0018012	0.0702051	0.0306684											4.769e-05	1.703e-06
28	0.0695056	0.00178323	0.0695056	0.0303988											4.769e-05	1.673e-06
29	0.0688354	0.00176601	0.0688354	0.0302304											4.769e-05	1.645e-06
30	0.0682146	0.00175007	0.0682146	0.0300949
31	0.0676796	0.00173633	0.0676796	0.0298139
32	0.0672069	0.00172419	0.0672069	0.0294555
33	0.066777	0.00171314	0.066777	0.0291079
34	0.0663924	0.00170326	0.0663924	0.0287426
35	0.0660556	0.00169461	0.0660556	0.0283487
36	0.0657627	0.00168709	0.0657627	0.0279265
37	0.0655129	0.00168067	0.0655129	0.0274916
38	0.0652839	0.00167478	0.0652839	0.0270783
39	0.0650669	0.0016692	0.0650669	0.0266962
40	0.0648567	0.0016638	0.0648567	0.0263714
41	0.0646515	0.00165853	0.0646515	0.0260873
42	0.0644582	0.00165357	0.0644582	0.0258444
43	0.0642711	0.00164876	0.0642711	0.0256583
44	0.0641049	0.00164449	0.0641049	0.0254634
45	0.0639566	0.00164068	0.0639566	0.0252695
46	0.0638411	0.00163771	0.0638411	0.0250232
47	0.0637572	0.00163555	0.0637572	0.0247484
48	0.063699	0.00163406	0.063699	0.0244668
49	0.0636587	0.00163302	0.0636587	0.024191

## Sheet: Figure 4
Figure 4
Model age confidence bands
All particles U200 isotopic composition
	5 pg (O-)		+/-95%		5 pg (O3-)				50 pg (O-)				50 pg (O3-)
	True Age	Model Age	+	-	True Age	Model Age	+	-	True Age	Model Age	+	-	True Age	Model Age	+	-
	0	1.11836	4.72872	1.11832	0	0.577151	2.39249	0.5771	0	0.111901	0.47489	0.111893	0	0.0583829	0.242186	0.0583824
	1.9934	2.40371	6.69116	2.40237	1.02226	1.27623	3.35004	1.27562	0.996701	1.0256	1.11006	0.681014	1.02226	1.02295	0.739085	0.537462
	3.9868	4.36307	7.79683	4.01191	2.04451	2.253	4.10379	2.1136	1.9934	2.02574	1.42682	1.06635	2.04451	2.03623	0.991415	0.784536
	5.9802	6.40404	8.77922	5.46656	3.06677	3.2457	4.68717	2.75915	2.9901	3.03117	1.68237	1.37376	2.96455	2.99617	1.15748	1.00929
	7.97361	8.29	10.3075	6.11636	4.08903	4.18495	5.20838	3.21247	3.9868	3.93882	2.01747	1.50462	3.9868	4.03707	1.27616	1.19128
	9.96701	10.2296	11.1701	7.02482	5.11129	5.34616	5.38571	3.73305	4.9835	5.04143	2.13795	1.81696	5.00906	5.04935	1.46017	1.34383
	11.9604	12.4916	11.257	8.37412	6.13354	6.2385	5.9872	4.06581	5.9802	5.97753	2.29015	2.02132	6.03132	6.03277	1.64989	1.43127
	13.9538	14.3564	12.4191	8.6241	7.1558	7.35272	6.52897	4.44461	6.97691	7.04032	2.43466	2.21624	6.95135	6.95427	1.71347	1.57595
	15.9472	16.2149	13.5707	9.16548	8.17806	8.34341	6.7167	4.9287	7.97361	7.96367	2.73286	2.21217	7.97361	8.02755	1.76256	1.78642
	17.9406	18.3785	13.7115	10.0814	9.20031	9.3634	7.18348	5.10566	8.97031	8.98714	2.85848	2.39071	8.99586	8.95232	2.04704	1.72437
	19.934	19.966	14.7923	10.3699	10.2226	10.2468	7.58565	5.31417	9.96701	9.98587	2.90497	2.60911	10.0181	10.0622	2.05607	1.95007
	21.9274	21.9403	15.1989	11.0569	11.2448	11.6523	7.43359	5.87864	10.9637	10.9223	3.04238	2.72852	11.0404	10.9889	2.2601	1.92422
	23.9208	24.5723	14.898	12.3112	12.2671	12.5643	7.80229	6.27053	11.9604	12.0696	3.14075	2.84832	11.9604	11.9243	2.42923	1.99109
	25.9142	26.1428	15.9952	12.1767	13.2893	13.2316	8.57867	5.99363	12.9571	13.0168	3.1472	3.1247	12.9827	13.0156	2.34136	2.18879
	27.9076	27.767	17.2552	12.0943	14.3116	14.7739	8.38549	6.76002	13.9538	13.9677	3.49408	3.09621	14.0049	13.9293	2.56211	2.18229
	29.901	29.8067	17.3162	12.8272	15.3339	15.5001	8.93314	6.71257	14.9505	14.9592	3.57652	3.16438	15.0272	14.9594	2.52545	2.28833
	31.8944	32.2285	17.6329	13.9904	16.3561	16.6768	9.04948	7.3368	15.9472	15.9736	3.69342	3.28364	16.0494	16.0756	2.58114	2.50635
	33.8878	34.4134	17.5252	15.0449	17.3784	17.3903	9.12355	7.4104	16.9439	16.9242	3.92357	3.35041	16.9695	16.9595	2.74194	2.54236
	35.8812	35.3194	19.3612	13.5658	18.4006	18.7278	9.44195	7.971	17.9406	17.9498	3.90876	3.43593	17.9917	18.0619	2.73773	2.68167
					19.4229	19.4987	9.79286	7.87747	18.9373	19.0035	3.93156	3.7504	19.014	19.0151	2.98258	2.60062
					20.4451	20.3458	10.1012	7.76949	19.934	19.8801	4.23932	3.71103	20.0362	20.0348	3.07893	2.66963
					21.4674	21.7065	10.1076	8.35216	20.9307	20.8696	4.28571	3.83919	20.9563	21.005	3.0495	2.83055
					22.4897	22.2897	10.776	7.99712	21.9274	21.9671	4.19739	4.07961	21.9785	22.0175	3.18876	2.87601
					22.4897	23.1489	9.95338	8.9226	22.9241	22.9272	4.41122	4.05258	23.0008	22.9739	3.23576	2.89203
					23.5119	23.7627	10.5481	8.65279	23.9208	24.0265	4.3196	4.27999	24.023	24.1171	3.1786	3.06723
					24.5342	24.5528	11.1573	8.48471	24.9175	24.9291	4.45631	4.31285	25.0453	24.9156	3.42629	3.0147
					25.5564	25.6206	11.4404	8.77737	25.9142	25.9706	4.58098	4.43525	25.9653	25.9865	3.4097	3.15733
					26.5787	26.6289	11.3023	9.13404	26.9109	26.9338	4.97778	4.22728	26.9876	26.8875	3.46243	3.11626
					27.601	27.9062	11.6755	9.22142	27.9076	27.8773	4.93138	4.49862	28.0099	28.0089	3.54536	3.2389
					28.6232	29.0231	11.2525	10.2138	28.9043	28.8646	4.97423	4.54773	29.0321	28.9216	3.73714	3.28809
					29.6455	29.7657	11.7624	9.83394	29.901	29.9331	5.07125	4.70061	29.9521	29.9286	3.41606	3.53148
					30.6677	30.6219	12.4887	9.30335	31.0971	31.0641	5.22706	4.82142	30.9744	31.0373	3.54473	3.58625
					31.69	32.0257	11.4617	10.642	32.0938	32.0141	5.40874	4.66017	31.9966	32.0011	3.68926	3.50653
					32.7122	32.8728	11.8862	10.874	33.0905	33.0959	5.31903	4.92919	33.0189	32.9007	4.00089	3.4523
					33.7345	34.1572	12.6076	10.5384	34.0872	34.147	5.49847	4.97202	34.0412	34.1344	3.91795	3.80335
					34.7567	35.0745	12.6571	10.8963	35.0839	35.0434	5.4533	5.0347	34.9612	34.9426	3.97656	3.67936

## Sheet: Figure 5
Figure 5
Simulated mass/size vs. model age uncertainty assuming 4% useful yield. True simulated age in bold.
U900												U630												U200												U030A
10 year				5 year				1 year				10 year				5 year				1 year				10 year				5 year				1 year				50 year				10 year				5 year				1 year
pg	model age	+	-	pg	model age	+	-	pg	model age	+	-	pg	model age	+	-	pg	model age	+	-	pg	model age	+	-	pg	model age	+	-	pg	model age	+	-	pg	model age	+	-	pg	model age	+	-	pg	model age	+	-	pg	model age	+	-	pg	model age
0.491346	10.1767	9.88251	-6.73588	0.491346	5.20589	7.43883	-4.54276	0.5	1.9954	5.56985	-1.99347	0.5	10.5502	11.5028	-7.38941	0.411585	5.36046	10.0955	-5.15114	0.5	1.18116	4.95807	-1.18114	0.5	11.9434	34.363	-11.9421	0.5	5.75398	24.02	-5.75368	0.5	5.83443	24.6086	-5.83423	0.458507	57.5707	168.552	-57.4917	0.5	26.2277	109.974	-26.2267	0.5	26.1041	108.959	-26.1018	0.5	26.1177
0.573237	10.1665	9.17555	-6.14409	0.655128	5.13527	6.47735	-3.87646	0.81891	1.23293	3.24741	-1.23076	0.514481	10.0807	11.3035	-6.76378	0.617378	5.08132	8.05658	-4.21315	0.504192	1.16265	4.78767	-1.16264	0.511129	12.6745	33.0399	-12.6741	0.500906	5.85556	23.8415	-5.85457	1.50226	1.94136	8.15422	-1.94136	0.917014	54.484	98.6577	-53.2502	1.12	11.6756	48.6274	-11.6755	1.37334	9.54995	40.2607	-9.54991	1.47577	8.90734
0.655128	10.1017	8.41243	-5.74134	0.81891	5.1268	5.57198	-3.57752	1.63782	1.08357	1.98974	-1.03596	0.617378	10.3233	9.56672	-6.95437	0.82317	5.14657	6.45516	-3.83841	1.02896	1.17452	3.38228	-1.17447	1.02226	10.5092	20.3956	-9.69305	1.02226	5.85222	16.8584	-5.84985	2.50453	1.17119	4.89107	-1.171	1.37552	51.6715	78.7442	-41.8127	1.12334	11.7322	48.744	-11.7314	2.24668	5.88436	24.3089	-5.88405	2.45153	5.30219
0.81891	10.2879	7.08952	-5.69035	0.982692	5.04832	4.9254	-3.31393	2.45673	1.09115	1.50539	-0.92034	0.720274	10.3858	8.98653	-6.20927	1.02896	5.05582	5.60691	-3.49952	2.05793	1.08075	1.99867	-0.989545	1.53339	10.411	15.1846	-8.63575	2.04451	5.38403	9.88712	-5.24559	5.11129	1.18852	3.34645	-1.18769	1.83403	51.2519	61.9284	-39.6938	2.29253	11.9911	33.3967	-11.9826	2.24668	5.84212	23.6766	-5.84151	3.4273	3.82798
0.900801	9.92014	7.08481	-4.86765	1.14647	5.05045	4.56441	-3.10728	3.27564	1.05938	1.23989	-0.794338	0.82317	10.3232	8.11892	-5.92208	1.23476	4.99941	5.11248	-3.14465	3.08689	1.05842	1.50789	-0.899011	2.04451	10.3079	12.6168	-7.78655	3.06677	5.20714	7.68677	-4.25561	10.2226	1.08783	2.06008	-1.00733	2.29253	51.294	55.017	-35.5	4.58507	10.5443	20.1789	-9.98329	4.58507	5.95247	16.7017	-5.9433	4.40306	3.00813
1.06458	10.2194	6.24269	-4.84727	1.31026	5.11641	4.12215	-2.89218	4.09455	1.0233	1.08884	-0.702543	0.926067	10.2155	7.56327	-5.61391	1.44055	5.03432	4.45406	-3.07419	4.11585	1.02481	1.28538	-0.763655	2.55564	10.0462	11.1753	-6.90411	4.08903	5.28705	6.27473	-4.00697	15.3339	1.06591	1.53158	-0.876616	2.75104	51.097	50.172	-32.7576	6.8776	10.6899	15.0378	-8.72667	9.17014	5.29033	10.1708	-4.97593	5.37883	2.44154
1.31026	9.93811	5.68843	-4.18595	1.47404	5.12546	3.70907	-2.85224	4.91346	1.03581	0.985603	-0.690987	1.13186	10.2125	6.86374	-5.0548	1.64634	5.10058	4.04997	-2.98067	5.14481	1.02131	1.116	-0.704664	3.06677	10.1796	9.92491	-6.52509	5.11129	5.03218	5.60996	-3.42564	20.4451	1.02998	1.27364	-0.786522	3.20955	51.3717	43.119	-32.6481	9.17014	10.2797	12.8601	-7.78767	13.7552	5.31219	7.46666	-4.46125	6.35459	2.0342
1.47404	10.1073	5.06431	-4.22181	1.8016	5.13122	3.377	-2.62439	5.73237	1.02144	0.898976	-0.630907	1.23476	9.96163	6.75011	-4.78895	2.05793	5.11234	3.59047	-2.70739	6.17378	1.01685	0.983205	-0.665101	3.5779	10.2548	8.80689	-6.22175	6.13354	5.13004	4.83357	-3.3596	25.5564	1.04719	1.08449	-0.720107	3.66806	50.3434	42.2641	-28.1195	11.4627	10.366	10.8741	-7.25151	18.3403	5.08983	6.25128	-3.98958	7.33036	1.77612
1.71971	9.89551	4.74399	-3.80139	1.96538	5.10075	3.1888	-2.50051	7.37019	1.01843	0.766385	-0.568442	1.44055	10.2286	5.83784	-4.80998	2.26372	5.12833	3.39245	-2.6545	7.20274	0.997251	0.917003	-0.597985	4.60016	10.2207	7.65068	-5.63338	7.1558	5.12716	4.37121	-3.18809	30.6677	1.00168	0.988687	-0.655581	4.58507	49.821	36.7981	-25.2406	13.7552	10.1673	9.84446	-6.50248	22.9254	5.18585	5.52761	-3.51562	8.30612	1.56492
2.04727	9.98554	4.3149	-3.54716	2.29295	5.09392	2.89896	-2.37531	8.1891	1.02299	0.724285	-0.542052	1.74924	10.1212	5.4386	-4.22284	2.6753	5.07118	3.07807	-2.43003	8.2317	1.03392	0.803419	-0.605561	5.11129	10.0602	7.27632	-5.31035	8.17806	5.1383	4.00042	-3.09896	40.8903	0.998151	0.863193	-0.55673	5.04358	50.8682	33.2019	-26.6722	16.0478	10.3477	8.88174	-6.25434	27.5104	5.12675	4.97188	-3.34611	9.28189	1.40591
2.37484	10.092	3.95044	-3.35965	2.78429	5.03842	2.62945	-2.11285	9.82692	1.01078	0.656329	-0.505411	2.05793	9.95087	4.86447	-3.81682	3.29268	4.99081	2.91594	-2.05868	9.26066	1.00382	0.790613	-0.530562	6.13354	10.063	6.67506	-4.86737	9.20031	5.22548	3.60591	-3.05004	46.0016	1.01623	0.76513	-0.567035	5.96059	49.9442	32.3833	-22.3774	18.3403	10.0972	8.31465	-5.8082	32.0955	5.25192	4.3634	-3.18675	10.2577	1.26664
2.78429	10.0525	3.57467	-3.17412	3.27564	5.02843	2.39151	-2.00814	11.4647	1.02175	0.585916	-0.465173	2.36661	10.0646	4.57431	-3.69518	3.70427	5.06941	2.621	-2.11094	11.3186	1.0169	0.703436	-0.504389	7.1558	10.1616	5.83948	-4.70644	11.2448	5.10214	3.44505	-2.55889	51.1129	1.01291	0.724565	-0.533601	6.8776	50.4846	28.3013	-21.9323	20.6328	10.1963	7.68222	-5.5514	36.6806	5.10993	4.02847	-3.0019	11.2334	1.16452
3.19375	10.0079	3.40055	-2.86139	3.76699	5.07766	2.14581	-1.94207	13.1026	1.00104	0.569025	-0.426978	2.7782	9.88843	4.2215	-3.35211	4.32164	4.99227	2.38786	-1.90117	13.3765	1.01741	0.609734	-0.48902	8.17806	10.0426	5.4207	-4.3468	13.2893	5.09816	3.08387	-2.42381	61.3354	1.01938	0.647376	-0.493738	8.25313	49.9851	25.8547	-20.4295	25.2179	10.1232	6.97578	-5.16203	45.8507	5.04556	3.60435	-2.61585	22.9254	1.2112
3.76699	10.0823	2.97211	-2.74488	4.42211	5.0721	2.03198	-1.74278	15.5593	1.00189	0.495278	-0.416759	3.18979	10.0171	3.80238	-3.24902	5.14481	5.03395	2.12858	-1.82954	15.4344	1.00347	0.601394	-0.414138	9.71144	10.0224	4.97058	-3.99324	15.3339	5.05317	2.89322	-2.23663	71.558	1.0191	0.596548	-0.456852	9.62865	50.3811	23.6608	-19.3445	27.5104	10.2393	6.31215	-5.25335	50.4358	5.06177	3.55859	-2.50403	45.8507	1.0742
4.42211	10.0338	2.8819	-2.49124	5.07724	4.9526	1.93275	-1.62507	18.016	0.995576	0.464182	-0.37537	3.80716	9.9611	3.54051	-2.91821	5.96798	5.01236	1.96478	-1.63847	17.4924	0.997618	0.552551	-0.404926	11.2448	9.93586	4.85038	-3.49051	17.3784	5.07896	2.64031	-2.12362	81.7806	1.00824	0.571435	-0.42768	11.0042	49.5957	22.8492	-17.3596	32.0955	9.85405	6.30571	-4.39298	59.6059	5.1482	2.96143	-2.53025	68.776	1.02768
5.15913	10.0336	2.55076	-2.45623	6.05993	5.07034	1.67948	-1.56757	20.4728	0.997844	0.426596	-0.362076	4.42454	9.94782	3.27388	-2.71823	6.99695	5.04146	1.81133	-1.5407	20.5793	1.00245	0.488667	-0.393157	12.7782	10.0351	4.22371	-3.61867	20.4451	4.98884	2.46876	-1.96272	97.1144	1.00042	0.492181	-0.407475	12.8382	50.3007	19.8054	-16.8357	38.9731	10.0003	5.3678	-4.19971	73.3611	5.05326	2.7858	-2.16344	91.7014	1.06484
5.97804	9.99611	2.51855	-2.17555	7.04263	5.01258	1.69733	-1.39416	24.5673	0.997849	0.395818	-0.325709	5.14481	10.0473	2.91019	-2.64278	8.2317	5.00653	1.67202	-1.44183	24.6951	1.01262	0.432987	-0.372136	15.3339	9.99283	3.98294	-3.10543	24.5342	5.02117	2.21695	-1.8304	112.448	1.00467	0.473874	-0.366971	15.1307	50.4663	18.159	-16.3044	45.8507	10.1805	4.82812	-3.9479	82.5313	5.02903	2.59924	-2.10826	114.627	1.02534
6.96073	9.97643	2.24313	-2.02898	8.1891	5.04392	1.45381	-1.31141	27.8429	1.01648	0.356121	-0.322187	5.96798	9.95682	2.83218	-2.32114	9.46646	5.03366	1.5191	-1.37426	27.782	1.00642	0.409767	-0.347815	17.8895	10.1157	3.58841	-3.00791	28.6232	5.09324	1.97915	-1.74194	132.893	1.00777	0.426798	-0.344098	17.8818	49.802	17.6943	-13.7299	52.7283	10.2331	4.32213	-3.85877	96.2865	5.02532	2.3715	-1.95506	137.552	1.03106
8.1891	10.0121	2.05862	-1.89604	9.49935	5.0224	1.364	-1.21275	32.7564	0.997959	0.342075	-0.28127	6.99695	10.0682	2.50595	-2.30465	11.1128	5.03613	1.37552	-1.2882	32.9268	0.996602	0.391189	-0.306473	20.9563	10.0744	3.33372	-2.78774	32.7122	5.04578	1.9289	-1.57134	153.339	1.00364	0.392184	-0.32697	20.6328	50.1708	15.5863	-13.6093	61.8984	10.0845	4.0683	-3.3809	114.627	5.00982	2.12434	-1.79244	160.477	1.00456
9.58125	10.0132	1.91935	-1.76855	11.1372	5.01453	1.23568	-1.13441	38.4888	0.999318	0.303567	-0.263463	8.12881	9.98254	2.33534	-2.08111	12.9649	4.99633	1.3863	-1.10554	38.0716	1.00101	0.35157	-0.296492	24.023	10.0009	3.1433	-2.65244	38.8458	5.04475	1.66939	-1.5569	184.006	0.99816	0.356632	-0.300736	24.3009	50.0493	14.7037	-12.3521	71.0686	10.0376	3.93906	-3.22881	132.967	5.02083	1.96492	-1.64009	183.403	1.01447
11.1372	9.98692	1.73184	-1.6586	12.9388	5.01767	1.15098	-1.07314	45.0401	1.00422	0.28417	-0.245796	9.56935	9.97337	2.21242	-1.80067	15.2287	5.04743	1.16696	-1.139	45.2744	0.995771	0.314753	-0.275621	28.1121	10.0304	2.79975	-2.51019	44.9793	4.98011	1.62665	-1.3443	209.563	1.01012	0.325437	-0.290302	28.4274	50.3315	13.2708	-11.7386	82.5313	10.0816	3.46862	-3.08857	155.892	4.98248	1.85593	-1.46799	206.328	1.01132
13.0207	10.0143	1.6567	-1.48528	15.2317	5.01516	1.06081	-0.980818	52.4102	1.00631	0.239208	-0.251846	11.1128	10.013	2.02687	-1.8233	17.6982	4.98636	1.10616	-1.02359	52.4771	0.998077	0.298891	-0.249274	33.2234	10.0956	2.48311	-2.38088	52.1351	5.01961	1.42913	-1.33005	245.342	1.00462	0.296741	-0.26691	33.0125	50.1011	12.0921	-10.9735	98.579	9.97444	3.2178	-2.73581	183.403	5.01175	1.66359	-1.41462	252.179	1.01395
15.2317	10.004	1.49024	-1.4021	17.6884	4.9991	1.02068	-0.889269	61.4183	0.997852	0.244252	-0.205923	12.9649	10.0042	1.80343	-1.73319	20.785	4.99968	1.01983	-0.928485	61.7378	0.99998	0.270515	-0.239371	38.3347	10.0101	2.40817	-2.1216	61.3354	5.01863	1.35647	-1.16151	291.343	1.00405	0.263095	-0.252049	38.5146	49.746	11.8539	-9.92485	114.627	10.0398	2.86918	-2.65567	210.913	4.99753	1.55151	-1.33804	298.03	1.00632
17.7704	10.0382	1.40246	-1.2859	20.6365	5.00057	0.916202	-0.858476	71.2452	0.998605	0.218889	-0.201946	15.2287	9.95374	1.70338	-1.52467	24.2835	5.0203	0.920144	-0.889733	72.0274	1.00358	0.257494	-0.216196	44.9793	10.0169	2.14549	-2.07857	71.558	5.01961	1.28161	-1.09322	337.345	1.00164	0.255211	-0.229796	44.9337	50.2903	9.70953	-10.4755	132.967	10.0794	2.66603	-2.49173	247.594	5.04063	1.40179	-1.30703	343.88	1.02307
20.7184	10.0112	1.32062	-1.20701	24.2397	5.00662	0.868106	-0.761851	83.5288	0.998127	0.202078	-0.186688	17.6982	9.993	1.56472	-1.46772	28.1936	4.97868	0.88994	-0.791773	83.346	0.997455	0.236548	-0.20246	52.6463	9.96186	2.10714	-1.79824	83.8251	5.00728	1.15605	-1.02661	393.569	0.99761	0.239163	-0.208805	52.7283	50.105	9.67468	-8.79623	155.892	10.0588	2.57143	-2.17583	288.859	5.00354	1.30137	-1.19981	389.731	1.00101
24.1578	10.0346	1.17704	-1.17388	28.1705	5.00149	0.802805	-0.735624	97.4503	0.9966	0.191644	-0.171406	20.6822	10.0088	1.41616	-1.38822	32.9268	5.00718	0.8117	-0.77135	97.7515	0.996524	0.209708	-0.190676	61.3354	9.98279	1.84847	-1.71923	98.1367	5.03424	1.00885	-1.01176	460.016	1.00245	0.212951	-0.202496	61.4399	49.9994	9.01865	-7.97181	181.11	10.0437	2.37026	-2.14154	339.295	4.98996	1.2126	-1.0766	458.507	1.01591
28.2524	10.001	1.16731	-1.04648	32.9202	5.00956	0.740225	-0.679948	113.829	0.998663	0.176401	-0.159817	24.1806	9.99179	1.30701	-1.2699	38.4832	4.9971	0.780731	-0.673577	114.215	0.998712	0.19756	-0.17285	71.558	9.99634	1.73325	-1.64232	114.493	5.03157	0.970848	-0.90842	536.685	0.996032	0.20847	-0.177745	71.5271	49.7424	8.2886	-7.53155	213.206	9.96077	2.18777	-1.91694	394.316	5.00977	1.12069	-0.983393	527.283	1.00216
33.0021	10.0059	1.02139	-0.990005	38.4888	4.9935	0.690415	-0.621533	133.482	1.00311	0.154438	-0.155253	28.2965	10.0087	1.25837	-1.18403	45.0686	5.01905	0.668517	-0.671403	132.736	1.00044	0.180705	-0.169059	83.8251	9.95384	1.70361	-1.38294	132.893	5.02313	0.881251	-0.873285	628.688	0.995697	0.190951	-0.168942	83.4483	50.0834	7.38493	-7.21688	247.594	10.0133	1.96683	-1.81843	458.507	5.02312	1.03011	-0.980374	618.985	1.00392
38.4888	9.98798	0.958645	-0.95476	45.0401	4.99179	0.641424	-0.560859	155.593	1.00154	0.148649	-0.141818	33.0297	10.0002	1.16082	-1.08868	52.4771	5.00603	0.634105	-0.614822	155.373	0.996806	0.173326	-0.149623	97.6256	9.99381	1.4644	-1.36725	155.383	5.01028	0.811816	-0.785071	730.914	0.996454	0.17813	-0.150111	97.662	50.118	7.0658	-6.61992	288.859	9.99922	1.85829	-1.67809	536.453	5.02631	0.922915	-0.904933	733.611	0.997814
44.9582	10.0084	0.890937	-0.852984	52.574	4.98292	0.607241	-0.516375	181.798	0.998369	0.139815	-0.130793	38.4832	10.0012	1.10618	-1.01058	61.3262	5.00953	0.603753	-0.578846	182.126	1.00012	0.15673	-0.141336	113.982	9.9694	1.41085	-1.27873	181.962	5.00734	0.777216	-0.706167	858.696	1.00099	0.156986	-0.146631	114.168	50.0518	6.62098	-6.05303	337.003	10.0087	1.69857	-1.56181	628.155	5.02674	0.831876	-0.851679	848.238	0.989219
52.4921	9.97751	0.88739	-0.773595	61.4183	4.98402	0.568139	-0.483186	212.098	0.995153	0.132958	-0.11726	44.9657	9.9676	1.02015	-0.912374	71.6158	4.99611	0.570724	-0.510956	211.966	1.00233	0.143748	-0.132129	133.405	9.96396	1.28194	-1.17165	211.607	5.01191	0.717282	-0.666073	1001.81	0.998657	0.145412	-0.139136	132.967	50.0279	6.16026	-5.67406	394.316	9.98567	1.56492	-1.49397	733.611	4.99553	0.796153	-0.772072	1008.72	0.999355
61.3364	10.0152	0.771817	-0.769328	71.5727	5.00047	0.502544	-0.483297	247.311	0.998001	0.123881	-0.107065	52.58	9.99289	0.941292	-0.897176	83.5518	4.99938	0.53034	-0.487367	247.98	1.00031	0.13223	-0.124516	155.383	10.0314	1.16401	-1.14797	247.386	5.00814	0.664459	-0.598646					155.434	50.027	5.9894	-5.15904	460.8	9.98325	1.47892	-1.31765	857.408	4.99722	0.760412	-0.695279
71.6546	10.0002	0.734026	-0.721109	83.6926	5.00428	0.45102	-0.460536	289.075	0.997969	0.114646	-0.100215	61.3262	10.0032	0.879938	-0.826042	97.7515	4.98736	0.484383	-0.448236	289.139	0.999903	0.125539	-0.114249	181.451	10.0106	1.10097	-1.07543	289.299	4.98997	0.624116	-0.567934					181.569	50.2395	4.93942	-5.2799	538.746	10.0148	1.30921	-1.25966	999.545	4.99875	0.693342	-0.664049
83.6107	9.99528	0.701239	-0.662906	97.6141	4.99804	0.4212	-0.433652	337.391	1.0014	0.107477	-0.0950249	71.6158	10.0001	0.781651	-0.78821	114.009	4.98148	0.489819	-0.38273	337.5	1.00213	0.113552	-0.109825	212.118	10.0097	0.997746	-0.995368	337.345	4.99833	0.567914	-0.534203					212.289	50.0256	4.77027	-4.69467	628.155	9.99317	1.24906	-1.14625	1000	4.99442	0.733774	-0.623112
97.696	9.99363	0.653653	-0.598047	113.992	4.99169	0.405974	-0.387194	394.715	0.999787	0.096407	-0.0915164	83.6547	9.99737	0.762345	-0.723047	133.148	5.00566	0.415677	-0.405668	394.093	1.00108	0.108594	-0.0977387	247.897	10.0236	0.943348	-0.913918	394.591	5.00436	0.524498	-0.497793					247.594	49.9949	4.47449	-4.32821	733.611	10.0191	1.1359	-1.13055
114.074	9.99944	0.624289	-0.574907	133.155	5.00328	0.374127	-0.370748	460.227	1.00102	0.0860603	-0.0890402	97.6486	9.9876	0.707921	-0.676077	155.579	4.9798	0.403485	-0.356994	460.975	0.998826	0.101142	-0.092476	289.299	10.0063	0.88722	-0.875938	461.038	5.00459	0.505389	-0.458029					289.318	50.047	4.11068	-4.17964	857.408	10.0111	1.08667	-0.984989
133.155	9.99437	0.570924	-0.557897	155.593	5.00704	0.346338	-0.346516	538.024	0.999913	0.0816244	-0.081188	114.112	9.99617	0.665648	-0.646177	181.715	5.00595	0.356918	-0.35695	538.148	0.999977	0.0917646	-0.0882885	337.856	9.99817	0.834396	-0.785353	537.707	4.99413	0.470296	-0.418826					337.92	49.9193	4.00073	-3.81919	999.545	9.97074	1.0519	-0.909132
155.511	9.99525	0.554619	-0.514943	181.634	4.99818	0.333046	-0.317624	628.104	0.999483	0.0771786	-0.0763226	133.148	9.98285	0.61357	-0.616905	212.172	4.99792	0.336342	-0.336292	627.667	1.00164	0.0843288	-0.0839478	394.591	9.98967	0.757114	-0.744612	627.666	4.99965	0.433818	-0.400404					394.316	50.0207	3.67161	-3.56768	1000	9.98209	1.03643	-0.922391
181.634	9.98617	0.530168	-0.477756	212.098	4.99617	0.317795	-0.301005	733.743	0.997872	0.0735897	-0.0686612	155.579	9.98759	0.590352	-0.56201	247.774	4.99596	0.322784	-0.303791	733.65	0.99797	0.0859128	-0.0719575	460.527	9.98676	0.727971	-0.702322	732.958	4.98281	0.410094	-0.3724					460.341	49.9592	3.54009	-3.29275
212.098	10.0036	0.48063	-0.483383	247.638	4.99158	0.299701	-0.278588	856.58	1.00122	0.0636048	-0.0683992	181.612	9.98249	0.56993	-0.53184	289.139	4.98815	0.314263	-0.284094	856.097	0.999216	0.0756614	-0.0708719	537.707	9.99729	0.671587	-0.666575	856.652	5.00254	0.353047	-0.370499					537.829	49.9854	3.20919	-3.18318
247.638	9.99665	0.474367	-0.45162	289.239	5.0018	0.265188	-0.281869	999.889	0.999479	0.0645461	-0.0627324	212.069	9.97881	0.540672	-0.501327	337.706	4.99346	0.297545	-0.266283	1000.15	1.00016	0.0695165	-0.0685455	628.177	9.99846	0.632993	-0.61329	999.768	4.99864	0.353942	-0.334878					628.155	49.9513	3.05219	-2.91933
289.239	9.99351	0.443579	-0.443109	337.719	4.99643	0.260979	-0.26247	1000	0.998713	0.0653798	-0.0607118	247.671	10.0051	0.4944	-0.503388	394.299	4.99028	0.274296	-0.250278					733.47	10.0056	0.603444	-0.595192	1000	5.01056	0.332571	-0.358548					733.153	49.9765	2.89468	-2.84195
337.719	9.99527	0.438759	-0.400584	394.387	5.00272	0.253434	-0.23833					289.241	9.99389	0.477553	-0.455832	460.564	5.00264	0.243921	-0.26086					856.14	10.0084	0.542535	-0.565975									856.491	49.9099	2.82223	-2.51533
394.387	10.011	0.404467	-0.411531	460.555	4.99512	0.238045	-0.236685					337.706	9.99645	0.464719	-0.419684	537.736	4.99869	0.248147	-0.235023					999.768	10.0003	0.51526	-0.531904									1000	49.9267	2.54899	-2.49675
460.555	9.99253	0.400227	-0.385799	537.86	4.99695	0.218225	-0.232629					394.401	9.99608	0.439173	-0.418891	628.079	4.9945	0.239546	-0.217882					1000	10.0117	0.546922	-0.520492
537.778	9.98883	0.37964	-0.375872	627.94	4.99511	0.218864	-0.209817					460.564	10.01	0.397434	-0.427256	733.239	4.99591	0.224534	-0.214379
628.022	9.99221	0.38058	-0.356044	733.416	4.99564	0.209786	-0.207868					537.839	9.99094	0.413439	-0.381372	856.303	5.00051	0.209887	-0.206285
733.334	9.99556	0.372115	-0.343299	856.416	4.99503	0.205452	-0.192833					627.976	9.99702	0.39361	-0.385034	999.946	4.99198	0.211868	-0.19248
856.334	10.0041	0.361638	-0.345299	1000.05	4.99426	0.19152	-0.194957					733.342	9.98147	0.382582	-0.370841	1000	5.0063	0.197286	-0.209508
999.971	9.9823	0.362359	-0.320903									856.303	9.99439	0.383125	-0.344094
1000	10.005	0.329477	-0.357134									1000.05	9.99127	0.35254	-0.35559
[truncated: 30 more columns]

## Sheet: Figure 6
Figure 6
U630 model ages vs mass and background count rate (monocollectot protocol with 400 s total counting 230Th)
	1 yr, 1 pg			1 yr, 3 pg			1 yr, 10 pg			1 yr, 35 pg
background rate (counts/s)	model age	+	-	model age	+	-	model age	+	-	model age	+	-
0	1.17839	3.33755	-1.17786	1.06297	1.5494	-0.845585	1.0036	0.762053	-0.502183	1.00969	0.365492	-0.307291
0.0025	1.34049	4.01376	-1.3395	1.11111	1.64265	-1.02802	1.03706	0.745413	-0.574556	1.01146	0.349533	-0.325628
0.005	1.49622	4.505	-1.49593	1.14933	1.70463	-1.14245	1.04599	0.775658	-0.614486	1.01336	0.37335	-0.317214
0.0075	1.60314	4.91885	-1.60257	1.12063	1.86026	-1.11627	1.03643	0.807902	-0.616315	1.01247	0.378425	-0.319184
0.01	1.75486	5.138	-1.7543	1.10963	1.98861	-1.10925	1.03398	0.841009	-0.641269	1.01305	0.368863	-0.343067
0.0125	1.84102	5.47626	-1.84099	1.13551	2.04274	-1.13524	1.03712	0.841009	-0.695246	1.00368	0.410084	-0.316473
0.015	1.93802	5.76222	-1.93714	1.14193	2.17177	-1.14103	1.02084	0.898293	-0.699107	1.01707	0.389583	-0.341521
0.0175	2.01643	6.0312	-2.01614	1.02479	2.39074	-1.0245	1.03274	0.918987	-0.698415	1.01474	0.399772	-0.34422
0.02	2.11156	6.21106	-2.11123	1.18038	2.28466	-1.18036	1.04132	0.932505	-0.726023	1.02557	0.385354	-0.362342
	5 yr, 1 pg			5 yr, 3 pg			5 yr, 10 pg			5 yr, 35 pg
background rate (counts/s)	model age	+	-	model age	+	-	model age	+	-	model age	+	-
0	5.11856	5.57358	-3.5237	5.06756	2.8255	-2.24138	4.97901	1.50871	-1.29829	5.0089	0.773003	-0.72907
0.0025	5.30496	6.07169	-3.85846	5.06743	3.07888	-2.23204	5.00834	1.52293	-1.34771	5.00937	0.791785	-0.737112
0.005	5.47994	6.14613	-4.44939	5.12322	3.03726	-2.40457	5.04004	1.48204	-1.35833	4.98874	0.814479	-0.692415
0.0075	5.27658	6.32144	-4.7436	5.12485	3.09282	-2.55195	5.0732	1.48118	-1.42599	5.01438	0.789484	-0.727876
0.01	5.56885	6.58067	-5.01744	5.04948	3.2355	-2.55141	5.0295	1.57046	-1.36788	5.02387	0.772301	-0.743302
0.0125	5.44798	6.82088	-5.22613	5.07953	3.2956	-2.54216	5.02592	1.60212	-1.35948	5.03846	0.781331	-0.772501
0.015	5.48657	6.77172	-5.32088	5.22542	3.1474	-2.89889	5.0566	1.56798	-1.3978	4.99729	0.851859	-0.711957
0.0175	5.29954	7.4956	-5.29736	5.14058	3.33287	-2.9735	5.0108	1.60048	-1.40219	5.02016	0.800731	-0.746621
0.02	5.33715	7.47407	-5.32331	5.06539	3.48774	-2.88093	5.04512	1.63494	-1.38379	5.0157	0.791631	-0.762605
	10 yr, 1 pg			10 yr, 3 pg			10 yr, 10 pg
background rate (counts/s)	model age	+	-	model age	+	-	model age	+	-
0	10.2602	7.33157	-5.39093	10.0528	3.87566	-3.46737	9.97476	2.08968	-1.89905
0.0025	10.4154	7.74391	-5.55678	10.1905	4.00501	-3.40282	9.98571	2.16561	-1.8403
0.005	10.3034	8.08103	-5.72572	10.1736	4.02546	-3.45401	9.99262	2.11173	-1.88535
0.0075	10.207	8.31572	-5.87794	10.0356	4.29307	-3.36307	10.0516	2.11097	-1.95209
0.01	10.3261	8.24662	-6.55238	10.1333	4.13558	-3.65725	10.0102	2.19351	-1.89703
0.0125	10.7	8.26303	-7.01062	10.095	4.24405	-3.65006	10.0874	2.14663	-1.95414
0.015	10.3611	8.85267	-7.02272	10.0304	4.33381	-3.67385	10.0232	2.23492	-1.93499
0.0175	10.284	9.35581	-6.84154	10.1046	4.64901	-3.60379	10.0453	2.21657	-1.92975
0.02	10.4357	9.64029	-7.49401	10.1362	4.50882	-3.7805	9.95742	2.2257	-1.9422
	50 yr, 1 pg			50 yr, 3 pg			50 yr, 10 pg
background rate (counts/s)	model age	+	-	model age	+	-	model age	+	-
0	50.325	14.6229	-13.391	49.9545	8.51133	-8.00929	49.9862	4.81771	-4.61358
0.0025	50.5729	14.9994	-13.4926	49.8907	8.84971	-7.69462	50.0763	4.73584	-4.69119
0.005	50.4235	15.4366	-13.5466	49.9396	8.73346	-7.69686	49.9412	4.66162	-4.66775
0.0075	50.8181	14.9903	-14.2973	50.0978	8.87587	-7.78601	50.0688	4.65767	-4.77549
0.01	50.0639	15.5647	-13.7048	50.0339	8.72314	-7.79874	50.03	4.82578	-4.4663
0.0125	50.1663	15.886	-13.3683	50.3088	8.7919	-7.9175	50.0954	4.64062	-4.63692
0.015	50.3332	15.3636	-13.9581	49.7853	9.31355	-7.58598	50.0662	4.54541	-4.67071
0.0175	50.2955	16.2299	-13.8713	50.1909	8.75637	-7.97235	49.9658	4.85776	-4.43805
0.02	50.4357	16.7607	-13.7909	50.0489	8.62578	-8.39736	50.0769	4.71774	-4.57122

## Sheet: Figure 8
Figure 8
Estimator comparison: location, absolute uncertainty, relative uncertainty
absolute (abs.) and relative (rel.) uncertainties given
	no background
n	mid68	+- (abs.)	+- (rel.)	mean	+- (abs.)	+- (rel.)	median	+- (abs.)	+- (rel.)	biweight	+- (abs.)	+- (rel.)	mode	+- (abs.)	+- (rel.)	POE	+- (abs.)	+- (rel.)
0	0.565332	0.565222	0.999805	0.977841	0.959769	0.981518	0.684635	0.698258	1.0199	0.731002	0.753125	1.03026	0.0106081	0.102996	9.70915	0	0	NaN
1	1.34156	1.1069	0.825084	1.95382	1.39652	0.714764	1.63914	1.21082	0.738692	1.70108	1.24325	0.730859	1.12885	1.06247	0.9412	1	1	1
2	2.42393	1.48093	0.610962	2.94546	1.70684	0.579482	2.62487	1.54751	0.589557	2.68988	1.57912	0.58706	2.04638	1.43052	0.699048	2	1.41421	0.707107
3	3.31631	1.79651	0.54172	3.95055	1.98133	0.501533	3.62944	1.86142	0.512867	3.70006	1.89422	0.511943	2.9956	1.73078	0.577774	3	1.73205	0.57735
4	4.38752	2.04399	0.465865	4.92873	2.21732	0.449877	4.60671	2.09954	0.455757	4.67192	2.13435	0.456846	3.93735	1.98428	0.503962	4	2	0.5
5	5.23217	2.2585	0.431656	5.93641	2.41603	0.406985	5.63101	2.3215	0.412271	5.68305	2.34993	0.413498	5.46603	2.33795	0.427724	5	2.23607	0.447214
6	6.25336	2.45037	0.391849	6.9504	2.60365	0.374604	6.62767	2.49241	0.376061	6.69144	2.53044	0.378161	6.08488	2.46675	0.405391	6	2.44949	0.408248
7	7.31823	2.67088	0.364963	7.95872	2.81918	0.354225	7.6199	2.72925	0.358174	7.69593	2.76847	0.359732	6.91985	2.63056	0.380147	7	2.64575	0.377964
8	8.2787	2.86357	0.345896	8.91743	2.97872	0.334033	8.60746	2.88155	0.334774	8.6627	2.93966	0.339347	8.04213	2.83586	0.352626	8	2.82843	0.353553
9	9.14224	3.02331	0.330697	9.95208	3.16357	0.31788	9.62648	3.07343	0.319268	9.68838	3.11692	0.321717	8.79354	2.96539	0.337224	9	3	0.333333
10	10.2264	3.19433	0.312361	10.9665	3.30366	0.30125	10.6439	3.24204	0.304591	10.7155	3.27269	0.305416	10.2823	3.2066	0.311857	10	3.16228	0.316228
	background = 0.0015 counts/s (typical NIST LG-SIMS), 400 s measurement
n	mid68	+- (abs.)	+- (rel.)	mean	+- (abs.)	+- (rel.)	median	+- (abs.)	+- (rel.)	biweight	+- (abs.)	+- (rel.)	mode	+- (abs.)	+- (rel.)	POE	+- (abs.)	+- (rel.)
0	0.566825	0.566809	0.999972	0.980308	0.968462	0.987916	0.678709	0.698417	1.02904	0.725201	0.753126	1.03851	0.00743364	0.0862186	11.5984	-0.6	0.774597	1.29099
1	0.990272	0.985644	0.995327	1.64525	1.34705	0.818751	1.31814	1.14156	0.866039	1.37801	1.18035	0.856561	0.519656	0.720872	1.38721	0.4	1.26491	3.16228
2	1.82841	1.44734	0.791584	2.48649	1.66566	0.669884	2.16954	1.53036	0.705385	2.23603	1.56658	0.700608	1.68064	1.2964	0.77137	1.4	1.61245	1.15175
3	2.88169	1.77518	0.61602	3.47416	1.97428	0.568275	3.15618	1.84667	0.585097	3.21807	1.87567	0.582856	2.54583	1.59557	0.626737	2.4	1.89737	0.790569
4	3.81106	2.03999	0.535282	4.44166	2.22946	0.501943	4.10474	2.09485	0.510349	4.17545	2.13857	0.512177	3.6489	1.91021	0.523503	3.4	2.14476	0.630812
5	4.92557	2.26805	0.460464	5.44384	2.41626	0.443852	5.13104	2.3366	0.455385	5.19626	2.35305	0.452835	4.18612	2.046	0.488758	4.4	2.36643	0.537825
6	5.73199	2.52977	0.441342	6.43833	2.6432	0.410541	6.11987	2.58586	0.422535	6.19038	2.60057	0.420099	5.24145	2.28942	0.436792	5.4	2.56905	0.475749
7	6.88017	2.69464	0.391653	7.4391	2.82013	0.379096	7.11336	2.74554	0.385969	7.18487	2.7655	0.384906	6.56206	2.56165	0.390373	6.4	2.75681	0.430752
8	7.82281	2.84525	0.363712	8.43269	2.96111	0.351147	8.10844	2.90129	0.357811	8.18725	2.93145	0.358051	7.52805	2.74373	0.364467	7.4	2.93258	0.396294
9	8.76389	3.04634	0.347601	9.44847	3.16921	0.33542	9.14893	3.11977	0.340998	9.19869	3.12418	0.339633	8.1355	2.85228	0.350597	8.4	3.09839	0.368856
10	9.95025	3.18008	0.319598	10.4377	3.32641	0.318692	10.1355	3.23137	0.318817	10.1844	3.26015	0.320112	9.59996	3.09838	0.322749	9.4	3.25576	0.346358

## Sheet: Figure 9
Figure 9	Coverage properties of Bayesian (B), Feldman-Cousins (FC), and Roe-Woodroofe (RW) mid68 estimators.
	Also coverage of alternative Bayesian estimators, such as the mean, median, and biweight comapred to propagation of uncertainties (POE)
	Mid68 coverage							nominally 68% coverage
mu	FC68cover	FC95cover	RW68cover	RW95cover	B68cover	B95cover		Bmeancover	Bmediancover	Bbiweightcover	POEcover
0	0.878099	0.976885	0.878099	0.976885	0.878099	0.976885		0.548812	0.548812	0.548812	0.878099
1	0.71929	0.976318	0.921187	0.976318	0.921187	0.976318		0.783358	0.783358	0.783358	0.581462
2	0.80315	0.98283	0.80315	0.98283	0.610039	0.98283		0.661728	0.80315	0.80315	0.80315
3	0.718429	0.961005	0.718429	0.988329	0.718429	0.961005		0.816795	0.718429	0.718429	0.718429
4	0.74231	0.970421	0.74231	0.970421	0.65539	0.970421		0.761739	0.65539	0.65539	0.65539
5	0.695055	0.963107	0.695055	0.963107	0.695055	0.963107		0.714587	0.606353	0.714587	0.606353
6	0.763488	0.971772	0.763488	0.971772	0.655935	0.942144		0.674406	0.763488	0.763488	0.763488
7	0.728574	0.95749	0.728574	0.95749	0.728574	0.95749		0.639913	0.728574	0.728574	0.728574
8	0.69778	0.956662	0.69778	0.956662	0.69778	0.956662		0.69778	0.69778	0.69778	0.69778
9	0.734405	0.966818	0.734405	0.966818	0.670428	0.942849		0.744061	0.670428	0.670428	0.670428
10	0.71058	0.956567	0.71058	0.956567	0.71058	0.956567		0.720296	0.645962	0.645962	0.645962
11	0.688875	0.958383	0.688875	0.958383	0.688875	0.945741		0.698458	0.698458	0.698458	0.623928
12	0.743386	0.96742	0.743386	0.96742	0.669005	0.948679		0.678343	0.678343	0.678343	0.743386
13	0.724733	0.959916	0.724733	0.959916	0.650735	0.959916		0.659767	0.724733	0.724733	0.724733
14	0.70732	0.952045	0.70732	0.952045	0.70732	0.962685		0.64256	0.70732	0.70732	0.70732
15	0.691033	0.955591	0.691033	0.955591	0.691033	0.943915		0.691033	0.691033	0.691033	0.691033
16	0.726424	0.964575	0.726424	0.964575	0.675767	0.948285		0.675767	0.675767	0.675767	0.675767
17	0.712352	0.95869	0.712352	0.95869	0.712352	0.940834		0.718156	0.661427	0.661427	0.661427
18	0.699031	0.952597	0.699031	0.952597	0.699031	0.952597		0.704802	0.64793	0.704802	0.64793
19	0.6864	0.956737	0.6864	0.956737	0.6864	0.956737		0.692108	0.692108	0.692108	0.635201
20	0.731265	0.951089	0.731265	0.951089	0.674407	0.951089		0.68003	0.731265	0.731265	0.731265
avg	0.728666	0.96271	0.73828	0.964011	0.704592	0.956988		0.695452	0.69191	0.699772	0.694815
std	0.0438993	0.00883112	0.0606541	0.0104346	0.0705772	0.0120217		0.0556763	0.0573853	0.0529101	0.0685455
sem	0.00957962	0.00192711	0.0132358	0.00227701	0.0154012	0.00262336		0.0121496	0.0125225	0.0115459	0.0149578
UL 1sd	0.772565	0.971541	0.798934	0.974446	0.775169	0.96901		0.751129	0.749295	0.752682	0.76336
LL 1sd	0.684766	0.953879	0.677626	0.953577	0.634014	0.944967		0.639776	0.634525	0.646862	0.626269

## Sheet: Figure 10
Figure 10
background = 0.0015 counts/s (typical NIST LG-SIMS), 400 s measurement on 230Th
n	Bayesian_mid68	+-	FC_mid68	+-	RW_mid68	+-
0	0.566825	0.566809	0.37387	0.37387	0.645947	0.645947
1	0.990272	0.985644	1.07519	1.07519	1.14772	1.14772
2	1.82841	1.44734	2.02174	1.62834	2.04181	1.64841
3	2.88169	1.77518	2.72458	1.97635	2.72784	1.97961
4	3.81106	2.03999	3.95613	2.21985	3.95663	2.22035
5	4.92557	2.26805	4.67833	2.52774	4.67833	2.52774
6	5.73199	2.52977	5.95078	2.7272	5.95078	2.7272
7	6.88017	2.69464	6.67574	3.02488	6.67574	3.02488
8	7.82281	2.84525	7.70995	3.00861	7.70995	3.00861
9	8.76389	3.04634	8.96254	3.22787	8.96254	3.22787
10	9.95025	3.18008	9.69134	3.51467	9.69134	3.51467
n	Bayesian_mid68	+95%	-95%	FC_mid68	+95%	-95%	RW_mid68	+95%	-95%
0	0.566825	2.37058	-0.567	0.37387	2.19823	-0.37387	0.645947	2.44629	-0.645947
1	0.990272	3.32756	-0.99	1.07519	3.46785	-1.07519	1.14772	3.5333	-1.14772
2	1.82841	3.84236	-1.83	2.02174	4.09916	-2.02174	2.04181	4.13243	-2.04181
3	2.88169	4.41341	-2.67	2.72458	4.92687	-2.50663	2.72784	4.93563	-2.48885
4	3.81106	5.12608	-3.12	3.95613	5.20507	-3.18943	3.95663	5.20657	-3.18642
5	4.92557	5.32293	-3.66	4.67833	5.98126	-3.30795	4.67833	5.98126	-3.30745
6	5.73199	5.98068	-3.91	5.95078	6.20037	-4.11136	5.95078	6.20037	-4.11136
7	6.88017	6.00212	-4.59	6.67574	6.53454	-4.46968	6.67574	6.53454	-4.46968
8	7.82281	6.57561	-4.61	7.70995	6.98219	-5.13727	7.70995	6.98219	-5.13727
9	8.76389	6.84807	-5.14	8.96254	7.20945	-5.20499	8.96254	7.20945	-5.20499
10	9.95025	6.97213	-5.67	9.69134	7.52469	-5.53959	9.69134	7.52469	-5.53959

## Sheet: Figure 13
Figure 13
mid68 values of simulated particles, no background
particle number	mid68	+-
1	1.135e-05	7.45e-06			WM	SEM	+-95%	N_eff	MSWD	MSWD unc.
2	7.9e-06	3.1e-06		WM	8.69274e-06	8.50799e-07	1.84814e-06	15.7266	1.03864	0.368522
3	8.4e-06	2.8e-06		WMexp	9.2703e-06	0.00213726	0.00447333	19.1647	0.950287	0.331818
4	1.36e-05	5.7e-06		AVG	9.6075e-06	7.25225e-07
5	1.33e-05	5.6e-06
6	2.85e-06	2.85e-06
7	6.95e-06	5.55e-06
8	8.35e-06	2.85e-06
9	3.6e-06	2.8e-06
10	1.45e-05	3.7e-06
11	1.045e-05	5.15e-06
12	1.065e-05	4.15e-06
13	1.425e-05	4.85e-06
14	1.07e-05	5.2e-06
15	9.1e-06	3.8e-06
16	7.85e-06	3.05e-06
17	6.8e-06	5.5e-06
18	9.6e-06	3e-06
19	8.85e-06	3.75e-06
20	1.31e-05	3.6e-06

[truncated: 2 more sheets: SI Figure, Simulation Data]
